# Supplementary material
Source: PubMed Central journal article supplement (PMC6990712)
Supplement: jama-323-149-s001.pdf [file jama-323-149-s001.pdf]

## Supplementary Online Content

Hoffman KE, Penson DF, Zhao Z, et al. Patient-reported outcomes through 5 years for active surveillance, surgery, brachytherapy, or external beam radiation with or without androgen deprivation therapy for localized prostate cancer. *JAMA*. doi:10.1001/jama.2019.20675

**eMethods.** Explanation of Handling of Missing Data and Imputation

**eTable 1.** Number of Non-missing Expanded Prostate Cancer Index Composite (EPIC) Questionnaires by Time Point and Treatment Group

**eTable 2.** Number Missing Covariates for Multivariable Models

**eTable 3.** Probability of overall survival and disease-specific survival by treatment

**eTable 4.** Selected Clinical Treatment Details

**eTable 5.** Unadjusted functional outcomes of favorable risk patients on the Expanded Prostate Cancer Index Composite (EPIC) domain scores and selected individual item responses by treatment and time point; Adjusted differences between treatment groups and active surveillance patients in Expanded Prostate Cancer Index Composite domain scores and selected individual item responses by treatment and time point

**eTable 6.** Adjusted pairwise differences between treatment groups among favorable risk patients in Expanded Prostate Cancer Index Composite domain scores and selected individual item responses by treatment and time point

**eTable 7.** Proportion of patients with erections firm enough for intercourse at baseline who retained or regained erections firm enough for intercourse at 5 years by treatment group

**eTable 8.** Unadjusted functional outcomes of favorable risk patients on the Expanded Prostate Cancer Index Composite (EPIC) domain scores and selected individual item responses by treatment and time point; Adjusted differences between treatment groups and untreated active surveillance patients in Expanded Prostate Cancer Index Composite domain scores and selected individual item responses by treatment and time point

**eFigure 1.** Unadjusted disease-specific function by time among Active Surveillance patients who remained untreated and those who progressed to treatment

**eTable 9.** Unadjusted functional outcomes of unfavorable-risk patients on the Expanded Prostate Cancer Index Composite (EPIC) domain scores and selected individual item responses by treatment and time point; Adjusted differences between treatment groups in Expanded Prostate Cancer Index Composite domain scores and selected individual item responses by treatment and time point

**eTable 10.** Unadjusted general health related quality of life outcomes of favorable-risk patients by treatment and time point; Adjusted differences between treatment groups in general health related quality of life domain scores by treatment and time point

**eTable 11.** Unadjusted general health related quality of life outcomes of unfavorable-risk patients by treatment and time point; Adjusted differences between treatment groups in general health related quality of life domain scores by treatment and time point

**eFigure 2.** Adjusted general health related quality of life outcomes of favorable-risk patients by treatment and time point

**eFigure 3.** Adjusted general health related quality of life outcomes of unfavorable-risk patients by treatment and time point

**eTables 12-15 and eFigures 4-6.** Exploratory Analyses of Effect Modification of Covariates

This supplementary material has been provided by the authors to give readers additional information about their work.

## Supplemental Material

|                                                                                                                                                                                                                                                                                                                                                                                                                                              | <b>Page</b> |
|----------------------------------------------------------------------------------------------------------------------------------------------------------------------------------------------------------------------------------------------------------------------------------------------------------------------------------------------------------------------------------------------------------------------------------------------|-------------|
| <b>1.</b> eMethods: Explanation of Handling of Missing Data and Imputation                                                                                                                                                                                                                                                                                                                                                                   | 1           |
| <b>2.</b> eTable 1: Number of Non-missing Expanded Prostate Cancer Index Composite (EPIC) Questionnaires by Time Point and Treatment Group                                                                                                                                                                                                                                                                                                   | 2           |
| <b>3.</b> eTable 2: Number Missing Covariates for Multivariable Models                                                                                                                                                                                                                                                                                                                                                                       | 4           |
| <b>4.</b> eTable 3: Probability of overall survival and disease-specific survival by treatment                                                                                                                                                                                                                                                                                                                                               | 5           |
| <b>5.</b> eTable 4: Selected Clinical Treatment Details                                                                                                                                                                                                                                                                                                                                                                                      | 6           |
| <b>6.</b> eTable 5. Unadjusted functional outcomes of favorable risk patients on the Expanded Prostate Cancer Index Composite (EPIC) domain scores and selected individual item responses by treatment and time point; Adjusted differences between treatment groups and active surveillance patients in Expanded Prostate Cancer Index Composite domain scores and selected individual item responses by treatment and time point           | 7           |
| <b>7.</b> eTable 6: Adjusted pairwise differences between treatment groups among favorable risk patients in Expanded Prostate Cancer Index Composite domain scores and selected individual item responses by treatment and time point                                                                                                                                                                                                        | 11          |
| <b>8.</b> eTable 7: Proportion of patients with erections firm enough for intercourse at baseline who retained or regained erections firm enough for intercourse at 5 years by treatment group                                                                                                                                                                                                                                               | 14          |
| <b>9.</b> eTable 8: Unadjusted functional outcomes of favorable risk patients on the Expanded Prostate Cancer Index Composite (EPIC) domain scores and selected individual item responses by treatment and time point; Adjusted differences between treatment groups and untreated active surveillance patients in Expanded Prostate Cancer Index Composite domain scores and selected individual item responses by treatment and time point | 15          |
| <b>10.</b> eFigure 1: Unadjusted disease-specific function by time among Active Surveillance patients who remained untreated and those who progressed to treatment                                                                                                                                                                                                                                                                           | 19          |
| <b>11.</b> eTable 9. Unadjusted functional outcomes of unfavorable-risk patients on the Expanded Prostate Cancer Index Composite (EPIC) domain scores and selected individual item responses by treatment and time point; Adjusted differences between treatment groups in Expanded Prostate Cancer Index Composite domain scores and selected individual item responses by treatment and time point.                                        | 20          |
| <b>12.</b> eTable 10. Unadjusted general health related quality of life outcomes of favorable-risk patients by treatment and time point; Adjusted differences between treatment groups in general health related quality of life domain scores by treatment and time point.                                                                                                                                                                  | 23          |
| <b>13.</b> eTable 11. Unadjusted general health related quality of life outcomes of unfavorable-risk patients by treatment and time point; Adjusted differences between treatment groups in general health related quality of life domain scores by treatment and time point.                                                                                                                                                                | 24          |
| <b>14.</b> eFigure 2. Adjusted general health related quality of life outcomes of favorable-risk patients by treatment and time point.                                                                                                                                                                                                                                                                                                       | 25          |
| <b>15.</b> eFigure 3. Adjusted general health related quality of life outcomes of unfavorable-risk patients by treatment and time point.                                                                                                                                                                                                                                                                                                     | 26          |
| <b>16.</b> eTables 12-15 and eFigures 4-6: Exploratory Analyses of Effect Modification of Covariates                                                                                                                                                                                                                                                                                                                                         | 27          |

## eMethods

### Handling of Missing Data and Imputation

From the CEASAR analysis cohort, among those with the relevant treatments for this analysis, patients with no post-baseline outcome measures (EPIC domain scores) were excluded. The resulting data set is referred to as the analytic cohort (n=2,005).

According to the EPIC scoring algorithm, patients who answered at least 80% of questions within a particular domain received a score for that domain (computed as an average of the scores on questions that were answered, scaled from 0 to 100). Those who answered less than 80% of questions on a particular domain were considered to have missing data for that domain.<sup>1</sup>

### Multiple Imputation

Missing values of regression model covariates, including the values of the baseline EPIC domain score or individual EPIC item, were imputed using the MICE (Multiple imputation using chained equations) multiple imputation procedure.<sup>2,3</sup> No outcome variables were imputed. In this procedure, missing values of covariates are imputed by modeling each covariate as an outcome in a regression model, using all other model covariates as predictors. In this case, only baseline data (excluding treatment) were used. This is described by Harrell and implemented using the rms package in R.<sup>4,5,6</sup>

Multiple imputation was used to avoid case-wise deletion of all observations with at least one missing value of the independent variables. The imputation and regression model fitting with imputed data involve the following three steps: imputing the data using the imputation models, estimating coefficient parameters and their standard errors in the *analysis* regression models, and adjusting the standard error estimates to account for the variability associated with the imputation procedure.

To impute missing data on a covariate (X), we first imputed the missing data using a random sample of non-missing X. Then a flexible additive model was fit on a bootstrap resampled dataset using X as the outcome. Using this model, we obtained fitted values for the variable. To impute a missing value, we found non-missing X whose fitted value was closest to the fitted value of the missing observation, and imputed the missing value with the matching non-missing X. This approach is referred to as predictive mean matching.<sup>4</sup>

This resample-model-impute step was repeated 15 times after a burn-in period of 10 iterations with the missing values updated with the imputed values after each step. Then the final model was fit using the complete data set using the values imputed at the last iteration, and the standard error estimates were adjusted to account for additional uncertainty associated with the imputation as described in Harrell.<sup>4</sup>

### References:

1. Sanda MG, Wei JT, Litwin MS. Scoring Instructions for the Expanded Prostate Index Composite Short Form (EPIC-26). University of Michigan Web Site. <https://medicine.umich.edu/sites/default/files/content/downloads/Scoring%20Instructions%20for%20the%20EPIC%2026.pdf>. Accessed August 15, 2016.
2. Schafer JL. *Analysis of Incomplete Multivariate Data*. London (UK): Chapman & Hall; 1997.
3. White IR, Royston P, Wood AM. Multiple imputation using chained equations: Issues and guidance for practice. *Stat Med*. 2011;30:377-399.
4. Harrell FE, Jr. *Regression Modeling Strategies: With Applications to Linear Models, Logistic Regression, and Survival Analysis*. New York (NY): Springer-Verlag; 2001.
5. Harrell FE, Jr. rms: Regression Modeling Strategies (R package version 4.5-0). R Foundation for Statistical Computing Web Site. <https://CRAN.R-project.org/package=rms>. Accessed August 15, 2016.
6. R: A language and environment for statistical computing. R Foundation for Statistical Computing Web Site. <https://www.R-project.org/>. Accessed August 15, 2016.

eTable 1. Number of Non-missing Expanded Prostate Index Composite Questionnaires By Time Point and Treatment Group

| Time Point           | Favorable-risk disease cohort |                                                      |                                                     |                                     |                                   | Unfavorable-risk disease cohort |                                                                                                   |                                     |
|----------------------|-------------------------------|------------------------------------------------------|-----------------------------------------------------|-------------------------------------|-----------------------------------|---------------------------------|---------------------------------------------------------------------------------------------------|-------------------------------------|
|                      | All<br>(N=1,386)              | Nerve-Sparing<br>Radical<br>Prostatectomy<br>(N=675) | External<br>Beam<br>Radiation<br>Therapy<br>(N=261) | LDR<br>Brachy-<br>therapy<br>(N=87) | Active<br>Surveillance<br>(N=363) | All<br>(N=619)                  | External<br>Beam<br>Radiation<br>Therapy<br>with<br>Androgen<br>Deprivation<br>Therapy<br>(N=217) | Radical<br>Prostatectomy<br>(N=402) |
| Baseline             | 1386 (100%)                   | 675 (100%)                                           | 261 (100%)                                          | 87 (100%)                           | 363 (100%)                        | 619 (100%)                      | 217 (100%)                                                                                        | 402 (100%)                          |
| Sexual               | 1322 (95%)                    | 648 (96%)                                            | 248 (95%)                                           | 85 (98%)                            | 341 (94%)                         | 580 (94%)                       | 199 (92%)                                                                                         | 381 (95%)                           |
| Urinary Incontinence | 1339 (97%)                    | 658 (97%)                                            | 251 (96%)                                           | 84 (97%)                            | 346 (95%)                         | 597 (96%)                       | 211 (97%)                                                                                         | 386 (96%)                           |
| Urinary Irritative   | 1331 (96%)                    | 649 (96%)                                            | 250 (96%)                                           | 84 (97%)                            | 348 (96%)                         | 595 (96%)                       | 210 (97%)                                                                                         | 385 (96%)                           |
| Bowel                | 1355 (98%)                    | 662 (98%)                                            | 256 (98%)                                           | 86 (99%)                            | 351 (97%)                         | 606 (98%)                       | 212 (98%)                                                                                         | 394 (98%)                           |
| Hormone              | 1331 (96%)                    | 651 (96%)                                            | 246 (94%)                                           | 84 (97%)                            | 350 (96%)                         | 592 (96%)                       | 203 (94%)                                                                                         | 389 (97%)                           |
| 6 month              | 1356 (98%)                    | 665 (99%)                                            | 252 (97%)                                           | 85 (98%)                            | 354 (98%)                         | 589 (95%)                       | 208 (96%)                                                                                         | 381 (95%)                           |
| Sexual               | 1310 (95%)                    | 655 (97%)                                            | 237 (91%)                                           | 83 (95%)                            | 335 (92%)                         | 562 (91%)                       | 191 (88%)                                                                                         | 371 (92%)                           |
| Urinary Incontinence | 1344 (97%)                    | 659 (98%)                                            | 252 (97%)                                           | 82 (94%)                            | 351 (97%)                         | 583 (94%)                       | 205 (94%)                                                                                         | 378 (94%)                           |
| Urinary Irritative   | 1329 (96%)                    | 651 (96%)                                            | 249 (95%)                                           | 82 (94%)                            | 347 (96%)                         | 577 (93%)                       | 203 (94%)                                                                                         | 374 (93%)                           |
| Bowel                | 1348 (97%)                    | 662 (98%)                                            | 250 (96%)                                           | 82 (94%)                            | 354 (98%)                         | 585 (95%)                       | 206 (95%)                                                                                         | 379 (94%)                           |
| Hormone              | 1329 (96%)                    | 654 (97%)                                            | 240 (92%)                                           | 85 (98%)                            | 350 (96%)                         | 573 (93%)                       | 202 (93%)                                                                                         | 371 (92%)                           |
| 12 month             | 1318 (95%)                    | 651 (96%)                                            | 248 (95%)                                           | 84 (97%)                            | 335 (92%)                         | 570 (92%)                       | 198 (91%)                                                                                         | 372 (93%)                           |
| Sexual               | 1274 (92%)                    | 643 (95%)                                            | 238 (91%)                                           | 82 (94%)                            | 311 (86%)                         | 556 (90%)                       | 190 (88%)                                                                                         | 366 (91%)                           |
| Urinary Incontinence | 1266 (91%)                    | 621 (92%)                                            | 238 (91%)                                           | 80 (92%)                            | 327 (90%)                         | 545 (88%)                       | 184 (85%)                                                                                         | 361 (90%)                           |
| Urinary Irritative   | 1297 (94%)                    | 641 (95%)                                            | 245 (94%)                                           | 81 (93%)                            | 330 (91%)                         | 556 (90%)                       | 191 (88%)                                                                                         | 365 (91%)                           |
| Bowel                | 1309 (94%)                    | 645 (96%)                                            | 247 (95%)                                           | 83 (95%)                            | 334 (92%)                         | 567 (92%)                       | 197 (91%)                                                                                         | 370 (92%)                           |
| Hormone              | 1293 (93%)                    | 643 (95%)                                            | 236 (90%)                                           | 82 (94%)                            | 332 (91%)                         | 558 (90%)                       | 194 (89%)                                                                                         | 364 (91%)                           |

| Time Point              | Favorable-risk disease cohort |                                                      |                                                     |                                     |                                   | Unfavorable-risk disease cohort |                                                                                                   |                                     |
|-------------------------|-------------------------------|------------------------------------------------------|-----------------------------------------------------|-------------------------------------|-----------------------------------|---------------------------------|---------------------------------------------------------------------------------------------------|-------------------------------------|
|                         | All<br>(N=1,386)              | Nerve-Sparing<br>Radical<br>Prostatectomy<br>(N=675) | External<br>Beam<br>Radiation<br>Therapy<br>(N=261) | LDR<br>Brachy-<br>therapy<br>(N=87) | Active<br>Surveillance<br>(N=363) | All<br>(N=619)                  | External<br>Beam<br>Radiation<br>Therapy<br>with<br>Androgen<br>Deprivation<br>Therapy<br>(N=217) | Radical<br>Prostatectomy<br>(N=402) |
| 36 month                | 1195 (86%)                    | 602 (89%)                                            | 222 (85%)                                           | 72 (83%)                            | 299 (82%)                         | 511 (83%)                       | 170 (78%)                                                                                         | 341 (85%)                           |
| Sexual                  | 1158 (84%)                    | 592 (88%)                                            | 214 (82%)                                           | 70 (80%)                            | 282 (78%)                         | 487 (79%)                       | 160 (74%)                                                                                         | 327 (81%)                           |
| Urinary<br>Incontinence | 1172 (85%)                    | 592 (88%)                                            | 218 (84%)                                           | 71 (82%)                            | 291 (80%)                         | 494 (80%)                       | 162 (75%)                                                                                         | 332 (83%)                           |
| Urinary<br>Irritative   | 1163 (84%)                    | 590 (87%)                                            | 214 (82%)                                           | 69 (79%)                            | 290 (80%)                         | 500 (81%)                       | 164 (76%)                                                                                         | 336 (84%)                           |
| Bowel                   | 1190 (86%)                    | 600 (89%)                                            | 219 (84%)                                           | 72 (83%)                            | 299 (82%)                         | 505 (82%)                       | 167 (77%)                                                                                         | 338 (84%)                           |
| Hormone                 | 1174 (85%)                    | 592 (88%)                                            | 216 (83%)                                           | 71 (82%)                            | 295 (81%)                         | 495 (80%)                       | 163 (75%)                                                                                         | 332 (83%)                           |
| 60 month                | 1092 (79%)                    | 556 (82%)                                            | 203 (78%)                                           | 64 (74%)                            | 269 (74%)                         | 450 (73%)                       | 144 (66%)                                                                                         | 306 (76%)                           |
| Sexual                  | 1046 (75%)                    | 543 (80%)                                            | 192 (74%)                                           | 62 (71%)                            | 249 (69%)                         | 429 (69%)                       | 130 (60%)                                                                                         | 299 (74%)                           |
| Urinary<br>Incontinence | 1072 (77%)                    | 544 (81%)                                            | 199 (76%)                                           | 64 (74%)                            | 265 (73%)                         | 437 (71%)                       | 138 (64%)                                                                                         | 299 (74%)                           |
| Urinary<br>Irritative   | 1062 (77%)                    | 540 (80%)                                            | 198 (76%)                                           | 63 (72%)                            | 261 (72%)                         | 442 (71%)                       | 139 (64%)                                                                                         | 303 (75%)                           |
| Bowel                   | 1078 (78%)                    | 550 (81%)                                            | 200 (77%)                                           | 64 (74%)                            | 264 (73%)                         | 445 (72%)                       | 141 (65%)                                                                                         | 304 (76%)                           |
| Hormone                 | 1063 (77%)                    | 545 (81%)                                            | 193 (74%)                                           | 63 (72%)                            | 262 (72%)                         | 438 (71%)                       | 139 (64%)                                                                                         | 299 (74%)                           |

eTable 2. Number Missing Covariates for Multivariable Models

|                                      | <b>Favorable-risk disease cohort</b><br><b>N=1,386</b> | <b>Unfavorable-risk disease cohort</b><br><b>N=619</b> |
|--------------------------------------|--------------------------------------------------------|--------------------------------------------------------|
| <b>Age at diagnosis</b>              | 0 (0%)                                                 | 0 (0%)                                                 |
| <b>Race/ethnicity</b>                | 5 (0%)                                                 | 7 (1%)                                                 |
| <b>Education</b>                     | 33 (2%)                                                | 33 (5%)                                                |
| <b>Marital status</b>                | 36 (3%)                                                | 35 (6%)                                                |
| <b>Comorbidity score</b>             | 30 (2%)                                                | 30 (5%)                                                |
| <b>Prostate cancer risk category</b> | 0 (0%)                                                 | 0 (0%)                                                 |
| <b>PSA at diagnosis</b>              | 0 (0%)                                                 | 0 (0%)                                                 |
| <b>Clinical tumor stage</b>          | 6 (0%)                                                 | 2 (0%)                                                 |
| <b>Biopsy Gleason Group</b>          | 0 (0%)                                                 | 1 (0%)                                                 |
| <b>Accrual Site</b>                  | 0 (0%)                                                 | 0 (0%)                                                 |
| <b>Baseline Survey Scores</b>        |                                                        |                                                        |
| Sexual function                      | 64 (5%)                                                | 39 (6%)                                                |
| Urinary incontinence function        | 47 (3%)                                                | 22 (4%)                                                |
| Urinary irritative function          | 55 (4%)                                                | 24 (4%)                                                |
| Bowel function                       | 31 (2%)                                                | 13 (2%)                                                |
| Hormonal function                    | 55 (4%)                                                | 27 (4%)                                                |
| <b>Short-form 36</b>                 |                                                        |                                                        |
| Physical function scale              | 48 (3%)                                                | 18 (3%)                                                |
| General health scale                 | 5 (0%)                                                 | 1 (0%)                                                 |
| Emotional well-being                 | 33 (2%)                                                | 9 (1%)                                                 |
| Energy/fatigue                       | 5 (0%)                                                 | 1 (0%)                                                 |
| <b>Social support scale</b>          | 6 (0%)                                                 | 8 (1%)                                                 |
| <b>Depression scale</b>              | 35 (3%)                                                | 10 (2%)                                                |
| <b>Participatory decision-making</b> | 20 (1%)                                                | 16 (3%)                                                |

eTable 3. Probability of overall survival and disease-specific survival by treatment<sup>a</sup>

|                                                                                               | Favorable risk disease                      |                                         |                                    |                             |                | Unfavorable risk disease      |                                                                           |                |
|-----------------------------------------------------------------------------------------------|---------------------------------------------|-----------------------------------------|------------------------------------|-----------------------------|----------------|-------------------------------|---------------------------------------------------------------------------|----------------|
|                                                                                               | Nerve-sparing radical prostatectomy (N=671) | External beam radiation therapy (N=258) | Low-dose-rate brachytherapy (N=85) | Active Surveillance (N=359) | P <sup>c</sup> | Radical prostatectomy (N=399) | External beam radiation therapy with androgen deprivation therapy (N=214) | P <sup>c</sup> |
| Median follow-up time in months (25 <sup>th</sup> , 75 <sup>th</sup> percentile) <sup>b</sup> | 72<br>(63,79)                               | 71<br>(63,78)                           | 74<br>(64,78)                      | 73<br>(62,78)               |                | 73<br>(63,79)                 | 73<br>(63,78)                                                             |                |
| All-cause deaths (n)                                                                          | 8                                           | 21                                      | 10                                 | 23                          | <0.001         | 12                            | 31                                                                        | <0.001         |
| Estimated 5-year overall survival <sup>c</sup>                                                | 99.2%<br>(98.6, 99.9)                       | 94.0%<br>(91.1, 97.0)                   | 92.6%<br>(87.0, 98.5)              | 94.7%<br>(92.3, 97.1)       |                | 97.7%<br>(96.2, 99.2)         | 91.8%<br>(88.2, 95.6)                                                     |                |
| Prostate cancer deaths (n)                                                                    | 0                                           | 0                                       | 0                                  | 1                           | 0.40           | 3                             | 5                                                                         | 0.10           |
| Estimated 5-year disease specific survival <sup>d</sup>                                       | 100%<br>(100, 100)                          | 100%<br>(100, 100)                      | 100%<br>(100, 100)                 | 100%<br>(100, 100)          |                | 99.5%<br>(98.8, 100)          | 99.0%<br>(97.7, 100)                                                      |                |

- a. Vital status, cause of death and follow-up time were determined by each registry through their internal processes. The most recent registry linkage dates for each site are: Atlanta, August 2018; CaPSURE, December 2017; Los Angeles September 2018; Louisiana, August 2018; New Jersey, July 2018; Utah, August 2018
- b. Median (25<sup>th</sup>, 75<sup>th</sup> percentile) follow-up time since diagnosis in months
- c. P value of the log-rank test
- d. The estimated survival probability was calculated using the Kaplan-Meier method



eTable 4. Selected Clinical Treatment Details

|                                               | Favorable-risk    | Unfavorable-Risk  |
|-----------------------------------------------|-------------------|-------------------|
| Prostatectomy Cohort                          | n=675             | n=402             |
| Surgical volume                               |                   |                   |
| Median (lower quartile, upper quartile)       | 10 (3, 16)        | 7 (3, 15)         |
| Robotic approach                              |                   |                   |
| Yes                                           | 542 (81%)         | 257 (66%)         |
| No                                            | 130 (19%)         | 132 (34%)         |
| Prostate gland volume                         |                   |                   |
| Median (lower quartile, upper quartile)       | 36 (27, 46)       | 32 (26, 44)       |
| External Beam Radiation Therapy Cohort        | n=261             | n=217             |
| Intensity-modulated radiation therapy         |                   |                   |
| Yes                                           | 198 (76%)         | 188 (87%)         |
| No                                            | 63 (24%)          | 29 (13%)          |
| Proton beam radiation therapy                 |                   |                   |
| Yes                                           | 16 (7%)           | 3 (1%)            |
| No                                            | 222 (93%)         | 198 (99%)         |
| Image-guided radiation therapy                |                   |                   |
| Yes                                           | 200 (85%)         | 181 (89%)         |
| No                                            | 35 (15%)          | 22 (11%)          |
| Radiation dose                                |                   |                   |
| Median (lower quartile, upper quartile)       | 7800 (7560, 7920) | 7800 (7600, 7920) |
| Radiation dose >= 7500                        |                   |                   |
| Yes                                           | 204 (81%)         | 196 (94%)         |
| No                                            | 47 (19%)          | 13 (6%)           |
| Radiation dose per fraction                   |                   |                   |
| Median (lower quartile, upper quartile)       | 180 (180, 192)    | 180 (180, 200)    |
| Radiation dose per fraction greater than 200? |                   |                   |
| Yes                                           | 22 (9%)           | 4 (2%)            |
| No                                            | 225 (91%)         | 199 (98%)         |
| Treatment of pelvic lymph nodes?              |                   |                   |
| Yes                                           | 14 (6%)           | 74 (35%)          |
| No                                            | 239 (94%)         | 137 (65%)         |
| Prostate gland volume                         |                   |                   |
| Median (lower quartile, upper quartile)       | 38 (27, 51)       | 36 (26, 51)       |
| Low-dose-rate Brachytherapy Cohort            | n=87              |                   |
| Radioisotope                                  |                   |                   |
| I125                                          | 69 (80%)          | n/a               |
| Pd103                                         | 15 (17%)          | n/a               |
| Cs131                                         | 2 (2%)            | n/a               |
| Radiation dose                                |                   |                   |
| Median (lower quartile, upper quartile)       | 145 (125, 145)    | n/a               |
| Prostate gland volume                         |                   |                   |
| Median (lower quartile, upper quartile)       | 32 (26, 40)       | n/a               |
| Active surveillance cohort                    | n=363             |                   |
| Prostate gland volume                         |                   |                   |
| Median (lower quartile, upper quartile)       | 40 (30, 58)       | n/a               |

eTable 5. Unadjusted functional outcomes of favorable risk patients on the Expanded Prostate Cancer Index Composite (EPIC) domain scores and selected individual item responses by treatment and time point; Adjusted differences between treatment groups and active surveillance patients in Expanded Prostate Cancer Index Composite domain scores and selected individual item responses by treatment and time point

| Time                                                | Unadjusted median (IQR) domain score |                                             |                                         |                                    |                             | Adjusted linear model; effect size = point difference between groups <sup>d</sup> |                         |         |        |                         |         |                    |                         |         |
|-----------------------------------------------------|--------------------------------------|---------------------------------------------|-----------------------------------------|------------------------------------|-----------------------------|-----------------------------------------------------------------------------------|-------------------------|---------|--------|-------------------------|---------|--------------------|-------------------------|---------|
|                                                     | N                                    | Nerve-sparing radical prostatectomy (N=675) | External beam radiation therapy (N=261) | Low-dose-rate brachytherapy (N=87) | Active surveillance (N=363) | Effect                                                                            | 95% Confidence Interval | p-value | Effect | 95% Confidence Interval | p-value | Effect             | 95% Confidence Interval | p-value |
| <b>Sexual Function Domain<sup>a</sup></b>           |                                      |                                             |                                         |                                    |                             |                                                                                   |                         |         |        |                         |         |                    |                         |         |
| <b>Sexual function score</b>                        |                                      |                                             |                                         |                                    |                             |                                                                                   |                         |         |        |                         |         |                    |                         |         |
| Baseline                                            | 1322                                 | 80 (53, 100)                                | 60 (28, 85)                             | 75 (38, 85)                        | 75 (42, 88)                 |                                                                                   |                         |         |        |                         |         |                    |                         |         |
| 6 month                                             | 1310                                 | 28 (10, 60)                                 | 53 (22, 78)                             | 60 (22, 80)                        | 70 (38, 85)                 | -36.7 <sup>b</sup>                                                                | [-40.1, -33.4]          | <0.001  | -7.8   | [-11.6, -4.0]           | <0.001  | -11.0 <sup>b</sup> | [-15.9, -6.0]           | <0.001  |
| 1 year                                              | 1274                                 | 38 (12, 70)                                 | 47 (21, 75)                             | 60 (19, 80)                        | 75 (41, 86)                 | -30.7 <sup>b</sup>                                                                | [-33.6, -27.8]          | <0.001  | -6.8   | [-10.1, -3.5]           | <0.001  | -10.1 <sup>b</sup> | [-14.6, -5.7]           | <0.001  |
| 3 year                                              | 1158                                 | 48 (14, 79)                                 | 43 (12, 75)                             | 59 (17, 80)                        | 63 (20, 85)                 | -15.2 <sup>b</sup>                                                                | [-18.8, -11.5]          | <0.001  | -4.8   | [-9.0, -0.6]            | 0.03    | -6.1               | [-12.1, -0.2]           | 0.04    |
| 5 year                                              | 1046                                 | 48 (15, 80)                                 | 28 (9, 69)                              | 53 (24, 78)                        | 55 (22, 85)                 | -9.8                                                                              | [-13.8, -5.8]           | <0.001  | -5.1   | [-10.0, -0.2]           | 0.04    | -1.4               | [-8.3, 5.4]             | 0.69    |
| <b>Sexual Function Individual Items<sup>c</sup></b> |                                      |                                             |                                         |                                    |                             |                                                                                   |                         |         |        |                         |         |                    |                         |         |
| <b>Sexual function bother</b>                       |                                      |                                             |                                         |                                    |                             |                                                                                   |                         |         |        |                         |         |                    |                         |         |
| Unadjusted frequency (%)                            |                                      |                                             |                                         |                                    |                             |                                                                                   |                         |         |        |                         |         |                    |                         |         |
| Baseline                                            | 1321                                 | 144 (22%)                                   | 71 (29%)                                | 16 (19%)                           | 80 (23%)                    |                                                                                   |                         |         |        |                         |         |                    |                         |         |
| 6 month                                             | 1327                                 | 366 (56%)                                   | 75 (31%)                                | 20 (24%)                           | 66 (19%)                    | 8.4                                                                               | [5.7, 12.5]             | <0.001  | 1.7    | [1.1, 2.7]              | 0.02    | 1.4                | [0.7, 2.6]              | 0.29    |
| 1 year                                              | 1282                                 | 317 (49%)                                   | 76 (32%)                                | 18 (22%)                           | 63 (20%)                    | 6.0                                                                               | [4.4, 8.1]              | <0.001  | 1.5    | [1.1, 2.1]              | 0.02    | 1.5                | [0.9, 2.5]              | 0.12    |
| 3 year                                              | 1164                                 | 240 (40%)                                   | 69 (32%)                                | 20 (29%)                           | 74 (26%)                    | 2.5                                                                               | [1.7, 3.6]              | <0.001  | 1.2    | [0.8, 1.9]              | 0.33    | 1.5                | [0.8, 2.7]              | 0.18    |
| 5 year                                              | 1058                                 | 193 (35%)                                   | 69 (35%)                                | 16 (25%)                           | 60 (24%)                    | 1.9                                                                               | [1.3, 2.8]              | <0.001  | 1.4    | [0.9, 2.2]              | 0.15    | 1.1                | [0.6, 2.3]              | 0.73    |
| <b>Erection insufficient for penetration</b>        |                                      |                                             |                                         |                                    |                             |                                                                                   |                         |         |        |                         |         |                    |                         |         |
| Unadjusted frequency (%)                            |                                      |                                             |                                         |                                    |                             |                                                                                   |                         |         |        |                         |         |                    |                         |         |
| Baseline                                            | 1331                                 | 216 (33%)                                   | 140 (56%)                               | 38 (45%)                           | 135 (39%)                   |                                                                                   |                         |         |        |                         |         |                    |                         |         |
| 6 month                                             | 1320                                 | 498 (76%)                                   | 152 (63%)                               | 45 (54%)                           | 141 (42%)                   | 14.0                                                                              | [9.4, 20.8]             | <0.001  | 2.0    | [1.3, 3.0]              | 0.001   | 1.9                | [1.1, 3.3]              | 0.03    |
| 1 year                                              | 1280                                 | 442 (69%)                                   | 157 (65%)                               | 42 (52%)                           | 126 (39%)                   | 9.9                                                                               | [7.1, 13.9]             | <0.001  | 1.9    | [1.4, 2.7]              | <0.001  | 1.9                | [1.2, 3.1]              | 0.01    |
| 3 year                                              | 1164                                 | 376 (63%)                                   | 146 (68%)                               | 38 (54%)                           | 140 (49%)                   | 3.6                                                                               | [2.5, 5.2]              | <0.001  | 1.7    | [1.1, 2.6]              | 0.02    | 1.7                | [0.9, 3.0]              | 0.10    |
| 5 year                                              | 1056                                 | 332 (61%)                                   | 145 (74%)                               | 39 (61%)                           | 143 (57%)                   | 1.9                                                                               | [1.3, 2.9]              | <0.001  | 1.5    | [0.9, 2.4]              | 0.11    | 1.3                | [0.6, 2.6]              | 0.48    |
| <b>Urinary Function Domains</b>                     |                                      |                                             |                                         |                                    |                             |                                                                                   |                         |         |        |                         |         |                    |                         |         |
| <b>Urinary Incontinence score</b>                   |                                      |                                             |                                         |                                    |                             |                                                                                   |                         |         |        |                         |         |                    |                         |         |
| Unadjusted median (IQR) domain score                |                                      |                                             |                                         |                                    |                             |                                                                                   |                         |         |        |                         |         |                    |                         |         |
| Baseline                                            | 1339                                 | 100 (81, 100)                               | 100 (79, 100)                           | 100 (92, 100)                      | 100 (85, 100)               |                                                                                   |                         |         |        |                         |         |                    |                         |         |
| 6 month                                             | 1344                                 | 73 (49, 100)                                | 100 (79, 100)                           | 94 (73, 100)                       | 100 (84, 100)               | -23.9 <sup>b</sup>                                                                | [-27.0, -20.9]          | <0.001  | -0.1   | [-2.8, 2.6]             | 0.96    | -7.0 <sup>b</sup>  | [-11.2, -2.8]           | <0.001  |
| 1 year                                              | 1266                                 | 79 (54, 100)                                | 100 (79, 100)                           | 97 (79, 100)                       | 100 (84, 100)               | -19.8 <sup>b</sup>                                                                | [-22.3, -17.3]          | <0.001  | 0.7    | [-1.6, 3.0]             | 0.54    | -5.2               | [-8.7, -1.6]            | 0.004   |
| 3 year                                              | 1172                                 | 79 (58, 100)                                | 100 (77, 100)                           | 100 (79, 100)                      | 94 (77, 100)                | -10.9 <sup>b</sup>                                                                | [-13.8, -8.0]           | <0.001  | 3.2    | [0.3, 6.1]              | 0.03    | -0.6               | [-5.1, 3.8]             | 0.78    |
| 5 year                                              | 1072                                 | 79 (58, 100)                                | 100 (79, 100)                           | 100 (81, 100)                      | 92 (73, 100)                | -10.9 <sup>b</sup>                                                                | [-14.2, -7.6]           | <0.001  | 4.9    | [1.3, 8.5]              | 0.007   | 0.7                | [-5.2, 6.6]             | 0.82    |

| Time                                     | N    | Nerve-sparing radical prostatectomy | External beam radiation therapy | Low-dose-rate brachytherapy | Active surveillance | Nerve-sparing radical prostatectomy vs. Active surveillance |                         |         | External beam radiation therapy vs. Active surveillance |                         |         | Low-dose-rate brachytherapy vs. Active surveillance                          |                         |         |  |  |  |
|------------------------------------------|------|-------------------------------------|---------------------------------|-----------------------------|---------------------|-------------------------------------------------------------|-------------------------|---------|---------------------------------------------------------|-------------------------|---------|------------------------------------------------------------------------------|-------------------------|---------|--|--|--|
|                                          |      | (N=675)                             | (N=261)                         | (N=87)                      | (N=363)             | Effect                                                      | 95% Confidence Interval | p-value | Effect                                                  | 95% Confidence Interval | p-value | Effect                                                                       | 95% Confidence Interval | p-value |  |  |  |
| <b>Urinary Irritative score</b>          |      |                                     |                                 |                             |                     | Unadjusted median (IQR) domain score                        |                         |         |                                                         |                         |         | Adjusted linear model: effect size = point difference between groups         |                         |         |  |  |  |
| Baseline                                 | 1331 | 88 (75, 100)                        | 88 (75, 94)                     | 94 (80, 100)                | 88 (75, 100)        |                                                             |                         |         |                                                         |                         |         |                                                                              |                         |         |  |  |  |
| 6 month                                  | 1329 | 94 (88, 100)                        | 94 (81, 100)                    | 81 (62, 88)                 | 94 (81, 100)        | 3.3                                                         | [1.6, 5.1]              | <0.001  | 0.5                                                     | [-1.7, 2.7]             | 0.66    | -11.8 <sup>b</sup>                                                           | [-16.1, -7.6]           | <0.001  |  |  |  |
| 1 year                                   | 1297 | 94 (88, 100)                        | 88 (81, 94)                     | 88 (69, 94)                 | 88 (81, 100)        | 4.2                                                         | [2.7, 5.6]              | <0.001  | 1.0                                                     | [-0.8, 2.7]             | 0.28    | -7.0 <sup>b</sup>                                                            | [-10.1, -3.9]           | <0.001  |  |  |  |
| 3 year                                   | 1163 | 94 (88, 100)                        | 88 (77, 100)                    | 94 (88, 94)                 | 88 (81, 100)        | 5.8 <sup>b</sup>                                            | [4.1, 7.6]              | <0.001  | 2.0                                                     | [-0.1, 4.0]             | 0.06    | 2.3                                                                          | [-0.8, 5.5]             | 0.15    |  |  |  |
| 5 year                                   | 1062 | 94 (88, 100)                        | 94 (81, 100)                    | 94 (84, 100)                | 88 (81, 100)        | 5.7 <sup>b</sup>                                            | [3.9, 7.4]              | <0.001  | 1.9                                                     | [-0.4, 4.1]             | 0.11    | 0.2                                                                          | [-3.6, 4.0]             | 0.91    |  |  |  |
| <b>Urinary Function Individual Items</b> |      |                                     |                                 |                             |                     |                                                             |                         |         |                                                         |                         |         |                                                                              |                         |         |  |  |  |
| <b>Urinary function bother</b>           |      |                                     |                                 |                             |                     | Unadjusted frequency (%)                                    |                         |         |                                                         |                         |         | Adjusted logistic model: effect size = odds ratio of moderate or big problem |                         |         |  |  |  |
| Baseline                                 | 1332 | 82 (13%)                            | 31 (12%)                        | 9 (11%)                     | 44 (13%)            |                                                             |                         |         |                                                         |                         |         |                                                                              |                         |         |  |  |  |
| 6 month                                  | 1345 | 94 (14%)                            | 25 (10%)                        | 17 (20%)                    | 33 (9%)             | 2.1                                                         | [1.3, 3.4]              | 0.004   | 0.9                                                     | [0.5, 1.7]              | 0.81    | 2.3                                                                          | [1.2, 4.4]              | 0.02    |  |  |  |
| 1 year                                   | 1284 | 65 (10%)                            | 16 (7%)                         | 8 (10%)                     | 28 (9%)             | 1.5                                                         | [1.0, 2.2]              | 0.05    | 0.8                                                     | [0.5, 1.4]              | 0.47    | 1.5                                                                          | [0.8, 2.8]              | 0.19    |  |  |  |
| 3 year                                   | 1190 | 56 (9%)                             | 21 (10%)                        | 6 (8%)                      | 26 (9%)             | 0.9                                                         | [0.5, 1.5]              | 0.69    | 0.7                                                     | [0.4, 1.3]              | 0.28    | 0.7                                                                          | [0.3, 1.8]              | 0.47    |  |  |  |
| 5 year                                   | 1084 | 55 (10%)                            | 17 (8%)                         | 6 (9%)                      | 24 (9%)             | 1.3                                                         | [0.8, 2.2]              | 0.31    | 0.8                                                     | [0.4, 1.5]              | 0.42    | 0.9                                                                          | [0.4, 2.4]              | 0.91    |  |  |  |
| <b>Urinary leakage</b>                   |      |                                     |                                 |                             |                     | Unadjusted frequency (%)                                    |                         |         |                                                         |                         |         | Adjusted logistic model: effect size = odds ratio of moderate or big problem |                         |         |  |  |  |
| Baseline                                 | 1353 | 41 (6%)                             | 11 (4%)                         | 3 (4%)                      | 16 (5%)             |                                                             |                         |         |                                                         |                         |         |                                                                              |                         |         |  |  |  |
| 6 month                                  | 1351 | 120 (18%)                           | 11 (4%)                         | 9 (11%)                     | 12 (3%)             | 11.7                                                        | [5.5, 24.9]             | <0.001  | 1.3                                                     | [0.5, 3.2]              | 0.62    | 3.6                                                                          | [1.4, 9.4]              | 0.01    |  |  |  |
| 1 year                                   | 1307 | 86 (13%)                            | 9 (4%)                          | 2 (2%)                      | 12 (4%)             | 7.5                                                         | [4.1, 13.8]             | <0.001  | 1.1                                                     | [0.5, 2.3]              | 0.87    | 1.6                                                                          | [0.6, 4.2]              | 0.33    |  |  |  |
| 3 year                                   | 1187 | 72 (12%)                            | 9 (4%)                          | 2 (3%)                      | 16 (5%)             | 2.5                                                         | [1.4, 4.8]              | 0.003   | 0.7                                                     | [0.3, 1.6]              | 0.43    | 0.4                                                                          | [0.1, 1.8]              | 0.23    |  |  |  |
| 5 year                                   | 1083 | 56 (10%)                            | 12 (6%)                         | 3 (5%)                      | 19 (7%)             | 1.9                                                         | [1.0, 3.4]              | 0.04    | 0.7                                                     | [0.3, 1.4]              | 0.29    | 0.8                                                                          | [0.2, 3.0]              | 0.77    |  |  |  |
| <b>Burning on urination</b>              |      |                                     |                                 |                             |                     | Unadjusted frequency (%)                                    |                         |         |                                                         |                         |         | Adjusted logistic model: effect size = odds ratio of moderate or big problem |                         |         |  |  |  |
| Baseline                                 | 1351 | 21 (3%)                             | 14 (5%)                         | 3 (4%)                      | 12 (3%)             |                                                             |                         |         |                                                         |                         |         |                                                                              |                         |         |  |  |  |
| 6 month                                  | 1348 | 7 (1%)                              | 8 (3%)                          | 7 (8%)                      | 5 (1%)              | 1.0                                                         | [0.3, 3.6]              | 0.97    | 3.1                                                     | [0.8, 12.0]             | 0.10    | 15.8                                                                         | [4.5, 55.8]             | <0.001  |  |  |  |
| 1 year                                   | 1308 | 7 (1%)                              | 7 (3%)                          | 11 (13%)                    | 4 (1%)              | 1.1                                                         | [0.4, 2.8]              | 0.87    | 2.0                                                     | [0.7, 5.3]              | 0.17    | 8.2                                                                          | [2.8, 23.8]             | <0.001  |  |  |  |
| 3 year                                   | 1189 | 6 (1%)                              | 4 (2%)                          | 1 (1%)                      | 5 (2%)              | 0.8                                                         | [0.2, 3.4]              | 0.79    | 0.9                                                     | [0.2, 5.1]              | 0.89    | 2.9                                                                          | [0.7, 12.7]             | 0.16    |  |  |  |
| 5 year                                   | 1081 | 1 (0%)                              | 1 (0%)                          | 2 (3%)                      | 2 (1%)              | 0.3                                                         | [0.0, 3.5]              | 0.33    | 1.2                                                     | [0.2, 9.3]              | 0.87    | 6.7                                                                          | [0.9, 53.5]             | 0.07    |  |  |  |
| <b>Frequent urination</b>                |      |                                     |                                 |                             |                     | Unadjusted frequency (%)                                    |                         |         |                                                         |                         |         | Adjusted logistic model: effect size = odds ratio of moderate or big problem |                         |         |  |  |  |
| Baseline                                 | 1353 | 117 (18%)                           | 52 (20%)                        | 12 (14%)                    | 72 (20%)            |                                                             |                         |         |                                                         |                         |         |                                                                              |                         |         |  |  |  |
| 6 month                                  | 1353 | 97 (15%)                            | 35 (14%)                        | 26 (31%)                    | 59 (17%)            | 1.2                                                         | [0.8, 1.9]              | 0.36    | 0.8                                                     | [0.4, 1.3]              | 0.31    | 3.5                                                                          | [1.8, 6.7]              | <0.001  |  |  |  |
| 1 year                                   | 1308 | 85 (13%)                            | 24 (10%)                        | 15 (18%)                    | 51 (15%)            | 0.9                                                         | [0.6, 1.2]              | 0.41    | 0.6                                                     | [0.4, 0.9]              | 0.01    | 1.8                                                                          | [1.1, 3.2]              | 0.03    |  |  |  |
| 3 year                                   | 1186 | 64 (11%)                            | 32 (15%)                        | 8 (11%)                     | 53 (18%)            | 0.5                                                         | [0.3, 0.8]              | 0.002   | 0.4                                                     | [0.3, 0.7]              | 0.002   | 0.6                                                                          | [0.3, 1.5]              | 0.32    |  |  |  |
| 5 year                                   | 1085 | 68 (12%)                            | 27 (13%)                        | 9 (14%)                     | 40 (15%)            | 0.8                                                         | [0.5, 1.2]              | 0.25    | 0.7                                                     | [0.4, 1.3]              | 0.32    | 1.3                                                                          | [0.5, 3.2]              | 0.54    |  |  |  |

| Time                                   | N    | Nerve-sparing<br>radical<br>prostatectomy | External beam<br>radiation<br>therapy | Low-dose-rate<br>brachytherapy | Active<br>surveillance | Nerve-sparing radical prostatectomy<br>vs. Active surveillance |                               |         | External beam radiation therapy<br>vs. Active surveillance                   |                               |         | Low-dose-rate brachytherapy<br>vs. Active surveillance |                               |         |  |
|----------------------------------------|------|-------------------------------------------|---------------------------------------|--------------------------------|------------------------|----------------------------------------------------------------|-------------------------------|---------|------------------------------------------------------------------------------|-------------------------------|---------|--------------------------------------------------------|-------------------------------|---------|--|
|                                        |      | (N=675)                                   | (N=261)                               | (N=87)                         | (N=363)                | Effect                                                         | 95%<br>Confidence<br>Interval | p-value | Effect                                                                       | 95%<br>Confidence<br>Interval | p-value | Effect                                                 | 95%<br>Confidence<br>Interval | p-value |  |
| <b>Bowel Function Domain</b>           |      |                                           |                                       |                                |                        |                                                                |                               |         |                                                                              |                               |         |                                                        |                               |         |  |
| <b>Bowel function score</b>            |      |                                           |                                       |                                |                        | Unadjusted median (IQR) domain score                           |                               |         | Adjusted linear model; effect size = point difference between groups         |                               |         |                                                        |                               |         |  |
| Baseline                               | 1355 | 100 (96, 100)                             | 100 (96, 100)                         | 100 (96, 100)                  | 100 (96, 100)          |                                                                |                               |         |                                                                              |                               |         |                                                        |                               |         |  |
| 6 month                                | 1348 | 100 (96, 100)                             | 96 (88, 100)                          | 96 (83, 100)                   | 100 (92, 100)          | -0.4                                                           | [-1.7, 0.9]                   | 0.52    | -3.7                                                                         | [-5.8, -1.7]                  | <0.001  | -5.9 <sup>b</sup>                                      | [-9.0, -2.9]                  | <0.001  |  |
| 1 year                                 | 1309 | 100 (96, 100)                             | 96 (88, 100)                          | 96 (83, 100)                   | 100 (92, 100)          | 0.0                                                            | [-1.0, 1.0]                   | 0.95    | -3.5                                                                         | [-5.1, -1.8]                  | <0.001  | -5.0 <sup>b</sup>                                      | [-7.6, -2.4]                  | <0.001  |  |
| 3 year                                 | 1190 | 100 (96, 100)                             | 96 (88, 100)                          | 100 (88, 100)                  | 100 (92, 100)          | 0.7                                                            | [-0.7, 2.1]                   | 0.32    | -2.9                                                                         | [-4.9, -0.9]                  | 0.005   | -2.7                                                   | [-5.5, 0.1]                   | 0.06    |  |
| 5 year                                 | 1078 | 100 (96, 100)                             | 96 (88, 100)                          | 100 (88, 100)                  | 100 (92, 100)          | 0.4                                                            | [-1.0, 1.9]                   | 0.55    | -2.7                                                                         | [-5.0, -0.5]                  | 0.02    | -2.3                                                   | [-5.1, 0.6]                   | 0.13    |  |
| <b>Bowel Function Individual Items</b> |      |                                           |                                       |                                |                        |                                                                |                               |         |                                                                              |                               |         |                                                        |                               |         |  |
| <b>Bowel function bother</b>           |      |                                           |                                       |                                |                        | Unadjusted frequency (%)                                       |                               |         | Adjusted logistic model; effect size = odds ratio of moderate or big problem |                               |         |                                                        |                               |         |  |
| Baseline                               | 1346 | 12 (2%)                                   | 6 (2%)                                | 3 (3%)                         | 16 (5%)                |                                                                |                               |         |                                                                              |                               |         |                                                        |                               |         |  |
| 6 month                                | 1347 | 20 (3%)                                   | 11 (4%)                               | 7 (8%)                         | 12 (3%)                | 1.7                                                            | [0.7, 4.2]                    | 0.22    | 2.4                                                                          | [1, 5.8]                      | 0.05    | 3.6                                                    | [1.3, 10.4]                   | 0.02    |  |
| 1 year                                 | 1294 | 11 (2%)                                   | 17 (7%)                               | 4 (5%)                         | 10 (3%)                | 1.1                                                            | [0.6, 2.2]                    | 0.77    | 1.8                                                                          | [0.9, 3.4]                    | 0.08    | 2                                                      | [0.9, 4.8]                    | 0.11    |  |
| 3 year                                 | 1191 | 10 (2%)                                   | 9 (4%)                                | 2 (3%)                         | 13 (4%)                | 0.6                                                            | [0.2, 1.6]                    | 0.27    | 1.0                                                                          | [0.4, 2.8]                    | 0.98    | 0.7                                                    | [0.1, 3.4]                    | 0.67    |  |
| 5 year                                 | 1081 | 13 (2%)                                   | 9 (4%)                                | 3 (5%)                         | 11 (4%)                | 1.1                                                            | [0.4, 2.5]                    | 0.90    | 1.2                                                                          | [0.5, 3.2]                    | 0.68    | 1.1                                                    | [0.2, 5]                      | 0.89    |  |
| <b>Bloody stools</b>                   |      |                                           |                                       |                                |                        | Unadjusted frequency (%)                                       |                               |         | Adjusted logistic model; effect size = odds ratio of moderate or big problem |                               |         |                                                        |                               |         |  |
| Baseline                               | 1353 | 2 (0%)                                    | 2 (1%)                                | 0 (0%)                         | 4 (1%)                 |                                                                |                               |         |                                                                              |                               |         |                                                        |                               |         |  |
| 6 month                                | 1348 | 2 (0%)                                    | 2 (1%)                                | 0 (0%)                         | 3 (1%)                 | 0.9                                                            | [0.1, 7.6]                    | 0.96    | 0.8                                                                          | [0.1, 8.4]                    | 0.88    | 0.1                                                    | [0, 8.2]                      | 0.28    |  |
| 1 year                                 | 1307 | 3 (0%)                                    | 2 (1%)                                | 1 (1%)                         | 3 (1%)                 | 0.4                                                            | [0.1, 1.9]                    | 0.25    | 0.9                                                                          | [0.2, 3.5]                    | 0.90    | 1.3                                                    | [0.1, 12.3]                   | 0.84    |  |
| 3 year                                 | 1190 | 1 (0%)                                    | 5 (2%)                                | 1 (1%)                         | 2 (1%)                 | 0.1                                                            | [0.0, 4.7]                    | 0.28    | 2.6                                                                          | [0.3, 21.9]                   | 0.39    | 0.7                                                    | [0, 13.6]                     | 0.83    |  |
| 5 year                                 | 1079 | 0 (0%)                                    | 1 (0%)                                | 0 (0%)                         | 0 (0%)                 | e                                                              |                               |         | e                                                                            |                               |         | e                                                      |                               |         |  |
| <b>Bowel urgency</b>                   |      |                                           |                                       |                                |                        | Unadjusted frequency (%)                                       |                               |         | Adjusted logistic model; effect size = odds ratio of moderate or big problem |                               |         |                                                        |                               |         |  |
| Baseline                               | 1356 | 16 (2%)                                   | 5 (2%)                                | 5 (6%)                         | 12 (3%)                |                                                                |                               |         |                                                                              |                               |         |                                                        |                               |         |  |
| 6 month                                | 1350 | 14 (2%)                                   | 10 (4%)                               | 9 (11%)                        | 14 (4%)                | 1.0                                                            | [0.5, 2.2]                    | 0.98    | 1.7                                                                          | [0.7, 3.9]                    | 0.23    | 4                                                      | [1.5, 10.4]                   | 0.005   |  |
| 1 year                                 | 1309 | 13 (2%)                                   | 18 (7%)                               | 8 (10%)                        | 10 (3%)                | 0.7                                                            | [0.4, 1.4]                    | 0.36    | 1.8                                                                          | [0.9, 3.5]                    | 0.09    | 2.4                                                    | [1.0, 5.7]                    | 0.05    |  |
| 3 year                                 | 1191 | 8 (1%)                                    | 16 (7%)                               | 3 (4%)                         | 14 (5%)                | 0.4                                                            | [0.2, 1.0]                    | 0.06    | 1.8                                                                          | [0.8, 4.3]                    | 0.18    | 1.1                                                    | [0.4, 3.3]                    | 0.86    |  |
| 5 year                                 | 1079 | 10 (2%)                                   | 15 (8%)                               | 6 (9%)                         | 13 (5%)                | 0.5                                                            | [0.2, 1.1]                    | 0.08    | 1.4                                                                          | [0.6, 3.2]                    | 0.42    | 2.0                                                    | [0.7, 6.0]                    | 0.20    |  |
| <b>Hormone Function Domain</b>         |      |                                           |                                       |                                |                        |                                                                |                               |         |                                                                              |                               |         |                                                        |                               |         |  |
| <b>Hormone function score</b>          |      |                                           |                                       |                                |                        | Unadjusted median (IQR) domain score                           |                               |         | Adjusted linear model; effect size = point difference between groups         |                               |         |                                                        |                               |         |  |
| Baseline                               | 1331 | 95 (90, 100)                              | 95 (85, 100)                          | 100 (81, 100)                  | 95 (85, 100)           |                                                                |                               |         |                                                                              |                               |         |                                                        |                               |         |  |
| 6 month                                | 1329 | 95 (85, 100)                              | 95 (85, 100)                          | 95 (85, 100)                   | 95 (85, 100)           | -1.2                                                           | [-2.7, 0.4]                   | 0.14    | -1.7                                                                         | [-3.6, 0.1]                   | 0.07    | -0.9                                                   | [-3.4, 1.6]                   | 0.48    |  |
| 1 year                                 | 1293 | 95 (85, 100)                              | 95 (84, 100)                          | 95 (81, 100)                   | 95 (85, 100)           | -0.8                                                           | [-2.1, 0.4]                   | 0.19    | -1.2                                                                         | [-2.7, 0.4]                   | 0.14    | 0.0                                                    | [-1.8, 1.8]                   | 0.99    |  |

| Time   |        |                                             |                                         |                                    | Nerve-sparing radical prostatectomy vs. Active surveillance |              |                         | External beam radiation therapy vs. Active surveillance |        |                         | Low-dose-rate brachytherapy vs. Active surveillance |        |                         |            |
|--------|--------|---------------------------------------------|-----------------------------------------|------------------------------------|-------------------------------------------------------------|--------------|-------------------------|---------------------------------------------------------|--------|-------------------------|-----------------------------------------------------|--------|-------------------------|------------|
|        | N      | Nerve-sparing radical prostatectomy (N=675) | External beam radiation therapy (N=261) | Low-dose-rate brachytherapy (N=87) | Active surveillance (N=363)                                 | Effect       | 95% Confidence Interval | p-value                                                 | Effect | 95% Confidence Interval | p-value                                             | Effect | 95% Confidence Interval | p-value    |
|        | 3 year | 1174                                        | 95 (85, 100)                            | 95 (85, 100)                       | 100 (90, 100)                                               | 95 (86, 100) | 0.4                     | [0.2, 1.0]                                              | 0.06   | 1.8                     | [0.8, 4.3]                                          | 0.18   | 1.1                     | [0.4, 3.3] |
| 5 year | 1063   | 95 (85, 100)                                | 95 (80, 100)                            | 95 (85, 100)                       | 95 (85, 100)                                                | 0.4          | [-1.3, 2]               | 0.65                                                    | -1.1   | [-3.2, 0.9]             | 0.28                                                | -0.5   | [-3.4, 2.5]             | 0.76       |

- Domain scores are from the Expanded Prostate Cancer Index Composite (EPIC-26). Domain scores are scaled from 0 to 100, with higher score indicating better function. The left side of the table shows unadjusted median domain score and interquartile range (25<sup>th</sup> percentile, 75<sup>th</sup> percentile). The right side shows multivariable model results. The effect size in the multivariable model for domain score indicates the adjusted mean point difference between groups at each time point. A minimally important difference in score is 10-12 points on the sexual function domain; 6-9 points on the urinary incontinence domain; 5-7 points on the urinary irritative domain; 4-6 points on the bowel domain; and 4-6 points on the hormonal domain 4-6. The primary outcome was the difference in domain score at 5 years.
- Signifies that the difference between groups exceeds the minimally important difference for clinical significance.
- Individual items are clinically important components of the domain, scored on a Likert scale and then dichotomized for group comparisons. The left side of the table shows the unadjusted number (%) of patients reporting a moderate or big problem. The right side shows the adjusted odds ratio of reporting a moderate or big problem comparing treatment groups.
- All regression models are adjusted for baseline domain score, age, race, comorbidity, disease risk group, physical function, social support, depression, medical decision-making style and accrual site.
- Analysis not performed because the limited number of events did not permit computation of reliable estimates

eTable 6. Adjusted pairwise differences between treatment groups among favorable risk patients in Expanded Prostate Cancer Index Composite domain scores and selected individual item responses by treatment and time point

| Time                                         | Nerve-sparing radical prostatectomy vs. External beam radiation therapy           |                         |         | Nerve-sparing radical prostatectomy vs. Low-dose-rate brachytherapy |                         |         | External beam radiation therapy vs. Low-dose-rate brachytherapy |                         |         |
|----------------------------------------------|-----------------------------------------------------------------------------------|-------------------------|---------|---------------------------------------------------------------------|-------------------------|---------|-----------------------------------------------------------------|-------------------------|---------|
|                                              | Effect                                                                            | 95% Confidence Interval | p-value | Effect                                                              | 95% Confidence Interval | p-value | Effect                                                          | 95% Confidence Interval | p-value |
| <b>Domain <sup>a</sup></b>                   |                                                                                   |                         |         |                                                                     |                         |         |                                                                 |                         |         |
| <b>Sexual function score</b>                 | Adjusted linear model; effect size = point difference between groups <sup>d</sup> |                         |         |                                                                     |                         |         |                                                                 |                         |         |
| 6 month                                      | -29.0 <sup>b</sup>                                                                | [-32.6, -25.3]          | <0.001  | -25.8 <sup>b</sup>                                                  | [-30.9, -20.7]          | <0.001  | 3.2                                                             | [-2.2, 8.5]             | 0.25    |
| 1 year                                       | -23.9 <sup>b</sup>                                                                | [-27.2, -20.6]          | <0.001  | -20.6 <sup>b</sup>                                                  | [-25.2, -15.9]          | <0.001  | 3.3                                                             | [-1.6, 8.2]             | 0.19    |
| 3 year                                       | -10.4 <sup>b</sup>                                                                | [-14.4, -6.4]           | <0.001  | -9.0                                                                | [-14.9, -3.2]           | 0.002   | 1.3                                                             | [-4.9, 7.6]             | 0.68    |
| 5 year                                       | -4.8                                                                              | [-9.3, -0.2]            | 0.04    | -8.4                                                                | [-15.1, -1.8]           | 0.01    | -3.7                                                            | [-10.8, 3.5]            | 0.32    |
| <b>Individual Items<sup>c</sup></b>          |                                                                                   |                         |         |                                                                     |                         |         |                                                                 |                         |         |
| <b>Sexual function bother</b>                | Adjusted logistic model; effect size = odds ratio of moderate or big problem      |                         |         |                                                                     |                         |         |                                                                 |                         |         |
| 6 month                                      | 4.9                                                                               | [3.5, 7.1]              | <0.001  | 6.0                                                                 | [3.4, 10.8]             | <0.001  | 1.2                                                             | [0.7, 2.3]              | 0.53    |
| 1 year                                       | 3.9                                                                               | [2.9, 5.4]              | <0.001  | 4.0                                                                 | [2.5, 6.6]              | <0.001  | 1.0                                                             | [0.6, 1.7]              | 0.94    |
| 3 year                                       | 2.0                                                                               | [1.4, 2.9]              | <0.001  | 1.7                                                                 | [1.0, 2.9]              | 0.06    | 0.8                                                             | [0.5, 1.5]              | 0.54    |
| 5 year                                       | 1.4                                                                               | [0.9, 2.1]              | 0.14    | 1.7                                                                 | [0.8, 3.4]              | 0.14    | 1.2                                                             | [0.6, 2.6]              | 0.58    |
| <b>Erection insufficient for penetration</b> | Adjusted logistic model; effect size = odds ratio of insufficient erection        |                         |         |                                                                     |                         |         |                                                                 |                         |         |
| 6 month                                      | 7.1                                                                               | [4.7, 10.7]             | <0.001  | 7.4                                                                 | [4.3, 12.9]             | <0.001  | 1.0                                                             | [0.6, 1.9]              | 0.88    |
| 1 year                                       | 5.2                                                                               | [3.6, 7.5]              | <0.001  | 5.3                                                                 | [3.2, 8.7]              | <0.001  | 1.0                                                             | [0.6, 1.7]              | 0.96    |
| 3 year                                       | 2.1                                                                               | [1.4, 3.3]              | <0.001  | 2.2                                                                 | [1.2, 3.9]              | 0.01    | 1.0                                                             | [0.5, 1.9]              | 0.98    |
| 5 year                                       | 1.3                                                                               | [0.8, 2.1]              | 0.24    | 1.5                                                                 | [0.8, 3.0]              | 0.24    | 1.1                                                             | [0.5, 2.4]              | 0.72    |
| <b>Domains</b>                               |                                                                                   |                         |         |                                                                     |                         |         |                                                                 |                         |         |
| <b>Incontinence score</b>                    | Adjusted linear model; effect size = point difference between groups              |                         |         |                                                                     |                         |         |                                                                 |                         |         |
| 6 month                                      | -23.9 <sup>b</sup>                                                                | [-27.0, -20.8]          | <0.001  | -16.9 <sup>b</sup>                                                  | [-21.4, -12.5]          | <0.001  | 6.9 <sup>b</sup>                                                | [2.7, 11.2]             | 0.001   |
| 1 year                                       | -20.5 <sup>b</sup>                                                                | [-23.3, -17.7]          | <0.001  | -14.6 <sup>b</sup>                                                  | [-18.6, -10.7]          | <0.001  | 5.9                                                             | [2.1, 9.6]              | 0.002   |
| 3 year                                       | -14.1 <sup>b</sup>                                                                | [-17.1, -11.1]          | <0.001  | -10.3 <sup>b</sup>                                                  | [-14.8, -5.7]           | <0.001  | 3.8                                                             | [-0.7, 8.3]             | 0.10    |
| 5 year                                       | -15.9 <sup>b</sup>                                                                | [-19.5, -12.3]          | <0.001  | -11.6 <sup>b</sup>                                                  | [-17.5, -5.7]           | <0.001  | 4.3                                                             | [-1.8, 10.3]            | 0.17    |
| <b>Urinary Irritative score</b>              | Adjusted linear model; effect size = point difference between groups              |                         |         |                                                                     |                         |         |                                                                 |                         |         |
| 6 month                                      | 2.8                                                                               | [0.9, 4.8]              | 0.005   | 15.2 <sup>b</sup>                                                   | [11, 19.3]              | <0.001  | 12.3 <sup>b</sup>                                               | [7.9, 16.7]             | <0.001  |
| 1 year                                       | 3.2                                                                               | [1.6, 4.8]              | <0.001  | 11.2 <sup>b</sup>                                                   | [8.1, 14.2]             | <0.001  | 8                                                               | [4.7, 11.3]             | <0.001  |
| 3 year                                       | 3.9                                                                               | [2.1, 5.7]              | <0.001  | 3.5                                                                 | [0.5, 6.5]              | 0.02    | -0.4                                                            | [-3.6, 2.9]             | 0.82    |
| 5 year                                       | 3.8                                                                               | [1.8, 5.8]              | <0.001  | 5.4 <sup>b</sup>                                                    | [1.7, 9.1]              | 0.004   | 1.6                                                             | [-2.4, 5.7]             | 0.42    |

| Time                           | Nerve-sparing radical prostatectomy vs. External beam radiation therapy      |                         |         | Nerve-sparing radical prostatectomy vs. Low-dose-rate brachytherapy |                         |         | External beam radiation therapy vs. Low-dose-rate brachytherapy |                         |         |
|--------------------------------|------------------------------------------------------------------------------|-------------------------|---------|---------------------------------------------------------------------|-------------------------|---------|-----------------------------------------------------------------|-------------------------|---------|
|                                | Effect                                                                       | 95% Confidence Interval |         | Effect                                                              | 95% Confidence Interval |         | Effect                                                          | 95% Confidence Interval |         |
|                                |                                                                              | Interval                | p-value |                                                                     | Interval                | p-value |                                                                 | Interval                | p-value |
| <b>Individual Items</b>        |                                                                              |                         |         |                                                                     |                         |         |                                                                 |                         |         |
| <b>Urinary function bother</b> | Adjusted logistic model; effect size = odds ratio of moderate or big problem |                         |         |                                                                     |                         |         |                                                                 |                         |         |
| 6 month                        | 2.2                                                                          | [1.3, 3.7]              | 0.003   | 0.9                                                                 | [0.5, 1.7]              | 0.76    | 0.4                                                             | [0.2, 0.8]              | 0.01    |
| 1 year                         | 1.8                                                                          | [1.1, 2.8]              | 0.01    | 1.0                                                                 | [0.5, 1.8]              | 0.98    | 0.6                                                             | [0.3, 1.1]              | 0.08    |
| 3 year                         | 1.3                                                                          | [0.7, 2.3]              | 0.41    | 1.2                                                                 | [0.5, 3.0]              | 0.62    | 1.0                                                             | [0.4, 2.5]              | 0.96    |
| 5 year                         | 1.7                                                                          | [0.9, 3.2]              | 0.09    | 1.4                                                                 | [0.6, 3.3]              | 0.48    | 0.8                                                             | [0.3, 2.1]              | 0.66    |
| <b>Urinary leakage</b>         | Adjusted logistic model; effect size = odds ratio of moderate or big problem |                         |         |                                                                     |                         |         |                                                                 |                         |         |
| 6 month                        | 9.3                                                                          | [4.6, 18.5]             | <0.001  | 3.3                                                                 | [1.6, 6.9]              | 0.002   | 0.4                                                             | [0.1, 0.9]              | 0.03    |
| 1 year                         | 7.1                                                                          | [3.8, 13.0]             | <0.001  | 4.7                                                                 | [2.0, 10.9]             | <0.001  | 0.7                                                             | [0.2, 1.8]              | 0.41    |
| 3 year                         | 3.6                                                                          | [1.7, 7.3]              | <0.001  | 6.3                                                                 | [1.5, 25.7]             | 0.01    | 1.8                                                             | [0.4, 8.0]              | 0.46    |
| 5 year                         | 2.9                                                                          | [1.4, 6.0]              | 0.005   | 2.3                                                                 | [0.7, 7.7]              | 0.19    | 0.8                                                             | [0.2, 3.1]              | 0.74    |
| <b>Burning on urination</b>    | Adjusted logistic model; effect size = odds ratio of moderate or big problem |                         |         |                                                                     |                         |         |                                                                 |                         |         |
| 6 month                        | 0.3                                                                          | [0.1, 1.0]              | 0.04    | 0.1                                                                 | [0.0, 0.2]              | <0.001  | 0.2                                                             | [0.1, 0.6]              | 0.004   |
| 1 year                         | 0.5                                                                          | [0.2, 1.2]              | 0.14    | 0.1                                                                 | [0.0, 0.4]              | <0.001  | 0.2                                                             | [0.1, 0.7]              | 0.009   |
| 3 year                         | 0.9                                                                          | [0.2, 4.5]              | 0.93    | 0.3                                                                 | [0.1, 1.2]              | 0.09    | 0.3                                                             | [0.1, 1.8]              | 0.19    |
| 5 year                         | 0.2                                                                          | [0.0, 3.6]              | 0.31    | 0.0                                                                 | [0.0, 0.8]              | 0.03    | 0.2                                                             | [0, 2.1.0]              | 0.17    |
| <b>Frequent urination</b>      | Adjusted logistic model; effect size = odds ratio of moderate or big problem |                         |         |                                                                     |                         |         |                                                                 |                         |         |
| 6 month                        | 1.6                                                                          | [1.0, 2.6]              | 0.04    | 0.4                                                                 | [0.2, 0.7]              | <0.001  | 0.2                                                             | [0.1, 0.4]              | <0.001  |
| 1 year                         | 1.5                                                                          | [1.0, 2.1]              | 0.05    | 0.5                                                                 | [0.3, 0.8]              | 0.005   | 0.3                                                             | [0.2, 0.6]              | <0.001  |
| 3 year                         | 1.1                                                                          | [0.7, 1.9]              | 0.67    | 0.8                                                                 | [0.3, 1.8]              | 0.53    | 0.7                                                             | [0.3, 1.7]              | 0.40    |
| 5 year                         | 1.0                                                                          | [0.6, 1.8]              | 0.96    | 0.6                                                                 | [0.2, 1.4]              | 0.21    | 0.6                                                             | [0.2, 1.4]              | 0.23    |
| <b>Domain</b>                  |                                                                              |                         |         |                                                                     |                         |         |                                                                 |                         |         |
| <b>Bowel function score</b>    | Adjusted linear model; effect size = point difference between groups         |                         |         |                                                                     |                         |         |                                                                 |                         |         |
| 6 month                        | 3.3                                                                          | [1.4, 5.2]              | <0.001  | 5.5 <sup>b</sup>                                                    | [2.5, 8.5]              | <0.001  | 2.2                                                             | [-1.2, 5.7]             | 0.20    |
| 1 year                         | 3.4                                                                          | [1.9, 4.9]              | <0.001  | 5.0 <sup>b</sup>                                                    | [2.4, 7.5]              | <0.001  | 1.5                                                             | [-1.3, 4.4]             | 0.29    |
| 3 year                         | 3.5                                                                          | [1.8, 5.3]              | <0.001  | 3.4                                                                 | [0.8, 6.0]              | 0.01    | -0.1                                                            | [-3.1, 2.9]             | 0.94    |
| 5 year                         | 3.2                                                                          | [1.2, 5.2]              | 0.002   | 2.7                                                                 | [0, 5.4]                | 0.05    | -0.5                                                            | [-3.7, 2.7]             | 0.76    |
| <b>Individual Items</b>        |                                                                              |                         |         |                                                                     |                         |         |                                                                 |                         |         |
| <b>Bowel function bother</b>   | Adjusted logistic model; effect size = odds ratio of moderate or big problem |                         |         |                                                                     |                         |         |                                                                 |                         |         |
| 6 month                        | 0.7                                                                          | [0.3, 1.6]              | 0.43    | 0.5                                                                 | [0.2, 1.3]              | 0.16    | 0.7                                                             | [0.2, 1.9]              | 0.44    |
| 1 year                         | 0.6                                                                          | [0.3, 1.2]              | 0.18    | 0.6                                                                 | [0.2, 1.3]              | 0.19    | 0.9                                                             | [0.4, 2.1]              | 0.78    |
| 3 year                         | 0.6                                                                          | [0.2, 1.6]              | 0.28    | 0.8                                                                 | [0.2, 4]                | 0.78    | 1.4                                                             | [0.3, 7.1]              | 0.67    |
| 5 year                         | 0.9                                                                          | [0.3, 2.3]              | 0.77    | 1                                                                   | [0.2, 4.2]              | 0.95    | 1.1                                                             | [0.2, 5.4]              | 0.90    |

| Time                          | Nerve-sparing radical prostatectomy vs. External beam radiation therapy      |             |         | Nerve-sparing radical prostatectomy vs. Low-dose-rate brachytherapy |             |         | External beam radiation therapy vs. Low-dose-rate brachytherapy |             |         |
|-------------------------------|------------------------------------------------------------------------------|-------------|---------|---------------------------------------------------------------------|-------------|---------|-----------------------------------------------------------------|-------------|---------|
|                               | 95% Confidence                                                               |             |         | 95% Confidence                                                      |             |         | 95% Confidence                                                  |             |         |
|                               | Effect                                                                       | Interval    | p-value | Effect                                                              | Interval    | p-value | Effect                                                          | Interval    | p-value |
| <b>Bloody stools</b>          | Adjusted logistic model; effect size = odds ratio of moderate or big problem |             |         |                                                                     |             |         |                                                                 |             |         |
| 6 month <sup>e</sup>          |                                                                              |             |         |                                                                     |             |         |                                                                 |             |         |
| 1 year                        | 0.4                                                                          | [0.1, 2.0]  | 0.28    | 0.3                                                                 | [0, 3.7]    | 0.36    | 0.7                                                             | [0.1, 6.9]  | 0.78    |
| 3 year                        | 0.1                                                                          | [0, 1.2]    | 0.07    | 0.2                                                                 | [0, 6.6]    | 0.37    | 3.6                                                             | [0.3, 45]   | 0.33    |
| 5 year <sup>e</sup>           | e                                                                            |             |         | e                                                                   |             |         | e                                                               |             |         |
| <b>Bowel urgency</b>          | Adjusted logistic model; effect size = odds ratio of moderate or big problem |             |         |                                                                     |             |         |                                                                 |             |         |
| 6 month                       | 0.6                                                                          | [0.3, 1.4]  | 0.23    | 0.3                                                                 | [0.1, 0.7]  | 0.005   | 0.4                                                             | [0.2, 1.2]  | 0.10    |
| 1 year                        | 0.4                                                                          | [0.2, 0.8]  | 0.008   | 0.3                                                                 | [0.1, 0.7]  | 0.008   | 0.7                                                             | [0.3, 1.8]  | 0.50    |
| 3 year                        | 0.2                                                                          | [0.1, 0.6]  | 0.001   | 0.4                                                                 | [0.1, 1.1]  | 0.08    | 1.6                                                             | [0.5, 4.9]  | 0.38    |
| 5 year                        | 0.3                                                                          | [0.1, 0.8]  | 0.02    | 0.2                                                                 | [0.1, 0.7]  | 0.01    | 0.7                                                             | [0.2, 2.1]  | 0.51    |
| <b>Domain</b>                 |                                                                              |             |         |                                                                     |             |         |                                                                 |             |         |
| <b>Hormone function score</b> | Adjusted linear model; effect size = point difference between groups         |             |         |                                                                     |             |         |                                                                 |             |         |
| 6 month                       | 0.6                                                                          | [-1.2, 2.4] | 0.52    | -0.2                                                                | [-2.7, 2.2] | 0.842   | -0.8                                                            | [-3.5, 1.9] | 0.55    |
| 1 year                        | 0.3                                                                          | [-1.2, 1.9] | 0.67    | -0.8                                                                | [-2.6, 1.0] | 0.39    | -1.1                                                            | [-3.2, 0.9] | 0.28    |
| 3 year                        | 0.3                                                                          | [-1.4, 2.0] | 0.71    | -1.1                                                                | [-3.2, 0.9] | 0.29    | -1.5                                                            | [-3.7, 0.8] | 0.21    |
| 5 year                        | 1.5                                                                          | [-0.4, 3.4] | 0.12    | 0.8                                                                 | [-2.0, 3.7] | 0.56    | -0.7                                                            | [-3.8, 2.4] | 0.66    |

- Domain scores are from the Expanded Prostate Cancer Index Composite (EPIC-26). Domain scores are scaled from 0 to 100, with higher score indicating better function. The effect size in the multivariable model for domain score indicates the adjusted mean point difference between groups at each time point. A minimally important difference in score is 10-12 points on the sexual function domain; 6-9 points on the urinary incontinence domain; 5-7 points on the urinary irritative domain; 4-6 points on the bowel domain; and 4-6 points on the hormonal domain 4-6. The primary outcome was the difference in domain score at 5 years.
- Signifies that the difference between groups exceeds the minimally important difference for clinical significance.
- Individual items are clinically important components of the domain, scored on a Likert scale and then dichotomized for group comparisons. The effect size of the logistic regression models indicates the adjusted odds ratio of reporting a moderate or big problem comparing treatment groups.
- All regression models are adjusted for baseline domain score, age, race, comorbidity, disease risk group, physical function, social support, depression, medical decision-making style and accrual site.
- Analysis not performed because the limited number of events did not permit computation of reliable estimates.



eTable 7: Proportion of patients with erections firm enough for intercourse at baseline who retained or regained erections firm enough for intercourse at 5 years by treatment group

| # of patients                                                             | Favorable Risk                      |                                 |                             |                     | Unfavorable Risk      |                                                                   |
|---------------------------------------------------------------------------|-------------------------------------|---------------------------------|-----------------------------|---------------------|-----------------------|-------------------------------------------------------------------|
|                                                                           | Nerve-sparing radical prostatectomy | External beam radiation therapy | Low-dose-rate brachytherapy | Active Surveillance | Radical Prostatectomy | External beam radiation therapy with androgen deprivation therapy |
| Reported erections firm enough for intercourse at baseline                | 428                                 | 109                             | 46                          | 200                 | 204                   | 80                                                                |
| Retained or regained erections firm enough for intercourse at 5 years (%) | 205<br>(48%)                        | 53<br>(49%)                     | 25<br>(54%)                 | 133<br>(66%)        | 63<br>(31%)           | 37<br>(46%)                                                       |

eTable 8. Unadjusted functional outcomes of favorable risk patients on the Expanded Prostate Cancer Index Composite (EPIC) domain scores and selected individual item responses by treatment and time point; Adjusted differences between treatment groups and untreated active surveillance patients in Expanded Prostate Cancer Index Composite domain scores and selected individual item responses by treatment and time point

| Time                                         | N    | Nerve-sparing radical prostatectomy | External beam radiation therapy | Low-dose-rate brachytherapy | Untreated active surveillance | Nerve-sparing radical prostatectomy vs. Untreated active surveillance |                         |         | External beam radiation therapy vs. Untreated active surveillance |                         |         | Low-dose-rate brachytherapy vs. Untreated active surveillance                     |                         |         |  |  |  |
|----------------------------------------------|------|-------------------------------------|---------------------------------|-----------------------------|-------------------------------|-----------------------------------------------------------------------|-------------------------|---------|-------------------------------------------------------------------|-------------------------|---------|-----------------------------------------------------------------------------------|-------------------------|---------|--|--|--|
|                                              |      | (N=675)                             | (N=261)                         | (N=87)                      | (N=274)                       | Effect                                                                | 95% Confidence Interval | p-value | Effect                                                            | 95% Confidence Interval | p-value | Effect                                                                            | 95% Confidence Interval | p-value |  |  |  |
| <b>Domain<sup>a</sup></b>                    |      |                                     |                                 |                             |                               |                                                                       |                         |         |                                                                   |                         |         |                                                                                   |                         |         |  |  |  |
| <b>Sexual function score</b>                 |      |                                     |                                 |                             |                               | Unadjusted median (IQR) domain score                                  |                         |         |                                                                   |                         |         | Adjusted linear model; effect size = point difference between groups <sup>d</sup> |                         |         |  |  |  |
| Baseline                                     | 1239 | 80 (53, 100)                        | 60 (28, 85)                     | 75 (38, 85)                 | 75 (43, 90)                   |                                                                       |                         |         |                                                                   |                         |         |                                                                                   |                         |         |  |  |  |
| 6 month                                      | 1230 | 28 (10, 60)                         | 53 (22, 78)                     | 60 (22, 80)                 | 73 (39, 90)                   | -35.6 <sup>b</sup>                                                    | [-39.2, -31.9]          | <0.001  | -6.7                                                              | [-10.8, -2.6]           | 0.001   | -9.7                                                                              | [-14.9, -4.6]           | <0.001  |  |  |  |
| 1 year                                       | 1193 | 38 (12, 70)                         | 47 (21, 75)                     | 60 (19, 80)                 | 75 (43, 90)                   | -30.7 <sup>b</sup>                                                    | [-33.8, -27.6]          | <0.001  | -6.8                                                              | [-10.4, -3.3]           | <0.001  | -10.1 <sup>b</sup>                                                                | [-14.7, -5.6]           | <0.001  |  |  |  |
| 3 year                                       | 1073 | 48 (14, 79)                         | 43 (12, 75)                     | 59 (17, 80)                 | 70 (27, 90)                   | -18.5 <sup>b</sup>                                                    | [-22.4, -14.6]          | <0.001  | -8.1                                                              | [-12.6, -3.6]           | <0.001  | -9.5                                                                              | [-15.7, -3.4]           | 0.002   |  |  |  |
| 5 year                                       | 968  | 48 (15, 80)                         | 28 (9, 69)                      | 53 (24, 78)                 | 65 (32, 85)                   | -14.8 <sup>b</sup>                                                    | [-19.0, -10.7]          | <0.001  | -10.2 <sup>b</sup>                                                | [-15.2, -5.1]           | <0.001  | -6.4                                                                              | [-13.4, 0.7]            | 0.08    |  |  |  |
| <b>Individual Items<sup>c</sup></b>          |      |                                     |                                 |                             |                               |                                                                       |                         |         |                                                                   |                         |         |                                                                                   |                         |         |  |  |  |
| <b>Sexual function bother</b>                |      |                                     |                                 |                             |                               | Unadjusted frequency (%)                                              |                         |         |                                                                   |                         |         | Adjusted logistic model; effect size = odds ratio of moderate or big problem      |                         |         |  |  |  |
| Baseline                                     | 1238 | 144 (22%)                           | 71 (29%)                        | 16 (19%)                    | 58 (22%)                      |                                                                       |                         |         |                                                                   |                         |         |                                                                                   |                         |         |  |  |  |
| 6 month                                      | 1244 | 366 (56%)                           | 75 (31%)                        | 20 (24%)                    | 49 (19%)                      | 8.3                                                                   | [5.3, 12.9]             | <0.001  | 1.6                                                               | [1.0, 2.7]              | 0.04    | 1.4                                                                               | [0.7, 2.6]              | 0.37    |  |  |  |
| 1 year                                       | 1199 | 317 (49%)                           | 76 (32%)                        | 18 (22%)                    | 41 (18%)                      | 6.2                                                                   | [4.4, 8.7]              | <0.001  | 1.5                                                               | [1.1, 2.3]              | 0.02    | 1.5                                                                               | [0.9, 2.6]              | 0.12    |  |  |  |
| 3 year                                       | 1079 | 240 (40%)                           | 69 (32%)                        | 20 (29%)                    | 46 (23%)                      | 3.0                                                                   | [2.0, 4.7]              | <0.001  | 1.5                                                               | [0.9, 2.4]              | 0.12    | 1.8                                                                               | [1.0, 3.4]              | 0.07    |  |  |  |
| 5 year                                       | 980  | 193 (35%)                           | 69 (35%)                        | 16 (25%)                    | 33 (19%)                      | 2.5                                                                   | [1.6, 3.9]              | <0.001  | 1.8                                                               | [1.0, 3.0]              | 0.04    | 1.5                                                                               | [0.7, 3.1]              | 0.34    |  |  |  |
| <b>Erection insufficient for penetration</b> |      |                                     |                                 |                             |                               | Unadjusted frequency (%)                                              |                         |         |                                                                   |                         |         | Adjusted logistic model; effect size = odds ratio of insufficient erection        |                         |         |  |  |  |
| Baseline                                     | 1247 | 216 (33%)                           | 140 (56%)                       | 38 (45%)                    | 100 (39%)                     |                                                                       |                         |         |                                                                   |                         |         |                                                                                   |                         |         |  |  |  |
| 6 month                                      | 1240 | 498 (76%)                           | 152 (63%)                       | 45 (54%)                    | 102 (40%)                     | 13.7                                                                  | [9, 20.7]               | <0.001  | 2.0                                                               | [1.3, 3.0]              | 0.002   | 1.9                                                                               | [1.1, 3.3]              | 0.03    |  |  |  |
| 1 year                                       | 1197 | 442 (69%)                           | 157 (65%)                       | 42 (52%)                    | 90 (38%)                      | 10.4                                                                  | [7.3, 14.8]             | <0.001  | 2.1                                                               | [1.4, 2.9]              | <0.001  | 2.0                                                                               | [1.2, 3.3]              | 0.005   |  |  |  |
| 3 year                                       | 1079 | 376 (63%)                           | 146 (68%)                       | 38 (54%)                    | 84 (42%)                      | 4.6                                                                   | [3.1, 7.0]              | <0.001  | 2.2                                                               | [1.4, 3.5]              | <0.001  | 2.2                                                                               | [1.2, 4.1]              | 0.01    |  |  |  |
| 5 year                                       | 978  | 332 (61%)                           | 145 (74%)                       | 39 (61%)                    | 85 (49%)                      | 2.9                                                                   | [1.9, 4.4]              | <0.001  | 2.2                                                               | [1.3, 3.6]              | 0.002   | 1.9                                                                               | [0.9, 3.9]              | 0.07    |  |  |  |
| <b>Domains</b>                               |      |                                     |                                 |                             |                               |                                                                       |                         |         |                                                                   |                         |         |                                                                                   |                         |         |  |  |  |
| <b>Urinary Incontinence score</b>            |      |                                     |                                 |                             |                               | Unadjusted median (IQR) domain score                                  |                         |         |                                                                   |                         |         | Adjusted linear model; effect size = point difference between groups              |                         |         |  |  |  |
| Baseline                                     | 1252 | 100 (81, 100)                       | 100 (79, 100)                   | 100 (92, 100)               | 100 (83, 100)                 |                                                                       |                         |         |                                                                   |                         |         |                                                                                   |                         |         |  |  |  |
| 6 month                                      | 1259 | 73 (49, 100)                        | 100 (79, 100)                   | 94 (73, 100)                | 100 (79, 100)                 | -23.2 <sup>b</sup>                                                    | [-26.5, -19.9]          | <0.001  | 1.0                                                               | [-2.0, 4.0]             | 0.50    | -5.8                                                                              | [-10.2, -1.5]           | 0.009   |  |  |  |
| 1 year                                       | 1181 | 79 (54, 100)                        | 100 (79, 100)                   | 97 (79, 100)                | 100 (85, 100)                 | -19.7 <sup>b</sup>                                                    | [-22.4, -17.0]          | <0.001  | 1.1                                                               | [-1.4, 3.6]             | 0.38    | -4.8                                                                              | [-8.4, -1.1]            | 0.01    |  |  |  |
| 3 year                                       | 1087 | 79 (58, 100)                        | 100 (77, 100)                   | 100 (79, 100)               | 100 (79, 100)                 | -13.0 <sup>b</sup>                                                    | [-16.0, -9.9]           | <0.001  | 1.4                                                               | [-1.7, 4.5]             | 0.37    | -2.6                                                                              | [-7.1, 2.0]             | 0.26    |  |  |  |
| 5 year                                       | 992  | 79 (58, 100)                        | 100 (79, 100)                   | 100 (81, 100)               | 100 (77, 100)                 | -14.5 <sup>b</sup>                                                    | [-17.7, -11.3]          | <0.001  | 1.7                                                               | [-1.9, 5.2]             | 0.36    | -2.8                                                                              | [-8.6, 3.1]             | 0.35    |  |  |  |

| Time                            | N    | Nerve-sparing radical prostatectomy | External beam radiation therapy | Low-dose-rate brachytherapy | Untreated active surveillance        | Nerve-sparing radical prostatectomy vs. Untreated active surveillance |                         |         | External beam radiation therapy vs. Untreated active surveillance |                                                                              |         | Low-dose-rate brachytherapy vs. Untreated active surveillance |                         |         |  |
|---------------------------------|------|-------------------------------------|---------------------------------|-----------------------------|--------------------------------------|-----------------------------------------------------------------------|-------------------------|---------|-------------------------------------------------------------------|------------------------------------------------------------------------------|---------|---------------------------------------------------------------|-------------------------|---------|--|
|                                 |      | (N=675)                             | (N=261)                         | (N=87)                      | (N=274)                              | Effect                                                                | 95% Confidence Interval | p-value | Effect                                                            | 95% Confidence Interval                                                      | p-value | Effect                                                        | 95% Confidence Interval | p-value |  |
| <b>Urinary Irritative score</b> |      |                                     |                                 |                             | Unadjusted median (IQR) domain score |                                                                       |                         |         |                                                                   | Adjusted linear model; effect size = point difference between groups         |         |                                                               |                         |         |  |
| Baseline                        | 1244 | 88 (75, 100)                        | 88 (75, 94)                     | 94 (80, 100)                | 88 (75, 94)                          |                                                                       |                         |         |                                                                   |                                                                              |         |                                                               |                         |         |  |
| 6 month                         | 1244 | 94 (88, 100)                        | 94 (81, 100)                    | 81 (62, 88)                 | 88 (77, 100)                         | 3.4                                                                   | [1.5, 5.4]              | <0.001  | 0.8                                                               | [-1.6, 3.1]                                                                  | 0.51    | -11.6 <sup>b</sup>                                            | [-15.9, -7.3]           | <0.001  |  |
| 1 year                          | 1211 | 94 (88, 100)                        | 88 (81, 94)                     | 88 (69, 94)                 | 88 (81, 100)                         | 4.1                                                                   | [2.5, 5.6]              | <0.001  | 1.1                                                               | [-0.8, 3.0]                                                                  | 0.25    | -7.0 <sup>b</sup>                                             | [-10.1, -3.8]           | <0.001  |  |
| 3 year                          | 1080 | 94 (88, 100)                        | 88 (77, 100)                    | 94 (88, 94)                 | 88 (81, 100)                         | 5.6 <sup>b</sup>                                                      | [3.6, 7.5]              | <0.001  | 1.9                                                               | [-0.3, 4.1]                                                                  | 0.10    | 2.1                                                           | [-1.2, 5.4]             | 0.21    |  |
| 5 year                          | 984  | 94 (88, 100)                        | 94 (81, 100)                    | 94 (84, 100)                | 88 (81, 100)                         | 5.8 <sup>b</sup>                                                      | [3.9, 7.7]              | <0.001  | 2.1                                                               | [-0.3, 4.5]                                                                  | 0.08    | 0.4                                                           | [-3.5, 4.3]             | 0.83    |  |
| <b>Individual Items</b>         |      |                                     |                                 |                             |                                      |                                                                       |                         |         |                                                                   |                                                                              |         |                                                               |                         |         |  |
| <b>Urinary function bother</b>  |      |                                     |                                 |                             | Unadjusted frequency (%)             |                                                                       |                         |         |                                                                   | Adjusted logistic model; effect size = odds ratio of moderate or big problem |         |                                                               |                         |         |  |
| Baseline                        | 1245 | 82 (13%)                            | 31 (12%)                        | 9 (11%)                     | 36 (14%)                             |                                                                       |                         |         |                                                                   |                                                                              |         |                                                               |                         |         |  |
| 6 month                         | 1260 | 94 (14%)                            | 25 (10%)                        | 17 (20%)                    | 27 (10%)                             | 2.0                                                                   | [1.2, 3.3]              | 0.01    | 0.8                                                               | [0.5, 1.6]                                                                   | 0.58    | 2.1                                                           | [1.0, 4.1]              | 0.04    |  |
| 1 year                          | 1200 | 65 (10%)                            | 16 (7%)                         | 8 (10%)                     | 20 (8%)                              | 1.6                                                                   | [1.0, 2.4]              | 0.05    | 0.8                                                               | [0.5, 1.4]                                                                   | 0.47    | 1.5                                                           | [0.8, 2.9]              | 0.21    |  |
| 3 year                          | 1107 | 56 (9%)                             | 21 (10%)                        | 6 (8%)                      | 16 (8%)                              | 1.1                                                                   | [0.6, 2.1]              | 0.68    | 0.8                                                               | [0.4, 1.7]                                                                   | 0.65    | 0.9                                                           | [0.3, 2.3]              | 0.80    |  |
| 5 year                          | 1003 | 55 (10%)                            | 17 (8%)                         | 6 (9%)                      | 14 (8%)                              | 1.7                                                                   | [0.9, 3.1]              | 0.09    | 0.9                                                               | [0.4, 2.0]                                                                   | 0.85    | 1.2                                                           | [0.4, 3.2]              | 0.73    |  |
| <b>Urinary leakage</b>          |      |                                     |                                 |                             | Unadjusted frequency (%)             |                                                                       |                         |         |                                                                   | Adjusted logistic model; effect size = odds ratio of moderate or big problem |         |                                                               |                         |         |  |
| Baseline                        | 1266 | 41 (6%)                             | 11 (4%)                         | 3 (4%)                      | 15 (6%)                              |                                                                       |                         |         |                                                                   |                                                                              |         |                                                               |                         |         |  |
| 6 month                         | 1266 | 120 (18%)                           | 11 (4%)                         | 9 (11%)                     | 11 (4%)                              | 10.3                                                                  | [4.5, 23.6]             | <0.001  | 1.0                                                               | [0.4, 2.8]                                                                   | 0.94    | 3.0                                                           | [1.1, 8.2]              | 0.03    |  |
| 1 year                          | 1221 | 86 (13%)                            | 9 (4%)                          | 2 (2%)                      | 10 (4%)                              | 7.2                                                                   | [3.7, 13.7]             | <0.001  | 0.9                                                               | [0.4, 2.1]                                                                   | 0.89    | 1.5                                                           | [0.5, 3.9]              | 0.45    |  |
| 3 year                          | 1102 | 72 (12%)                            | 9 (4%)                          | 2 (3%)                      | 9 (4%)                               | 3.5                                                                   | [1.7, 7.3]              | <0.001  | 0.9                                                               | [0.4, 2.3]                                                                   | 0.84    | 0.5                                                           | [0.1, 2.4]              | 0.41    |  |
| 5 year                          | 1002 | 56 (10%)                            | 12 (6%)                         | 3 (5%)                      | 7 (4%)                               | 4.0                                                                   | [1.7, 9.2]              | 0.001   | 1.3                                                               | [0.5, 3.4]                                                                   | 0.61    | 1.6                                                           | [0.4, 6.8]              | 0.49    |  |
| <b>Burning on urination</b>     |      |                                     |                                 |                             | Unadjusted frequency (%)             |                                                                       |                         |         |                                                                   | Adjusted logistic model; effect size = odds ratio of moderate or big problem |         |                                                               |                         |         |  |
| Baseline                        | 1264 | 21 (3%)                             | 14 (5%)                         | 3 (4%)                      | 8 (3%)                               |                                                                       |                         |         |                                                                   |                                                                              |         |                                                               |                         |         |  |
| 6 month                         | 1263 | 7 (1%)                              | 8 (3%)                          | 7 (8%)                      | 3 (1%)                               | 1.2                                                                   | [0.1, 12.5]             | 0.88    | 3.8                                                               | [0.4, 41.2]                                                                  | 0.27    | 19.6                                                          | [1.9, 207.8]            | 0.01    |  |
| 1 year                          | 1222 | 7 (1%)                              | 7 (3%)                          | 11 (13%)                    | 1 (0%)                               | 2.0                                                                   | [0.6, 6.6]              | 0.27    | 3.7                                                               | [1, 13.5]                                                                    | 0.04    | 14.9                                                          | [4, 55.1]               | <0.001  |  |
| 3 year                          | 1104 | 6 (1%)                              | 4 (2%)                          | 1 (1%)                      | 2 (1%)                               | 3.8                                                                   | [0.2, 74]               | 0.38    | 4.3                                                               | [0.2, 96.2]                                                                  | 0.36    | 13                                                            | [0.7, 247.6]            | 0.09    |  |
| 5 year                          | 1000 | 1 (0%)                              | 1 (0%)                          | 2 (3%)                      | 1 (1%)                               | e                                                                     |                         |         | e                                                                 |                                                                              |         | e                                                             |                         |         |  |
| <b>Frequent urination</b>       |      |                                     |                                 |                             | Unadjusted frequency (%)             |                                                                       |                         |         |                                                                   | Adjusted logistic model; effect size = odds ratio of moderate or big problem |         |                                                               |                         |         |  |
| Baseline                        | 1266 | 117 (18%)                           | 52 (20%)                        | 12 (14%)                    | 58 (22%)                             |                                                                       |                         |         |                                                                   |                                                                              |         |                                                               |                         |         |  |
| 6 month                         | 1268 | 97 (15%)                            | 35 (14%)                        | 26 (31%)                    | 51 (19%)                             | 1.1                                                                   | [0.7, 1.8]              | 0.72    | 0.6                                                               | [0.4, 1.1]                                                                   | 0.11    | 3.0                                                           | [1.5, 5.9]              | 0.001   |  |
| 1 year                          | 1222 | 85 (13%)                            | 24 (10%)                        | 15 (18%)                    | 39 (16%)                             | 0.8                                                                   | [0.6, 1.2]              | 0.30    | 0.5                                                               | [0.3, 0.8]                                                                   | 0.003   | 1.7                                                           | [1.0, 3.0]              | 0.06    |  |
| 3 year                          | 1101 | 64 (11%)                            | 32 (15%)                        | 8 (11%)                     | 37 (17%)                             | 0.5                                                                   | [0.3, 0.9]              | 0.01    | 0.5                                                               | [0.3, 0.8]                                                                   | 0.007   | 0.7                                                           | [0.3, 1.7]              | 0.44    |  |
| 5 year                          | 1004 | 68 (12%)                            | 27 (13%)                        | 9 (14%)                     | 28 (15%)                             | 0.8                                                                   | [0.5, 1.4]              | 0.50    | 0.8                                                               | [0.4, 1.4]                                                                   | 0.42    | 1.4                                                           | [0.6, 3.5]              | 0.44    |  |
| <b>Domain</b>                   |      |                                     |                                 |                             |                                      |                                                                       |                         |         |                                                                   |                                                                              |         |                                                               |                         |         |  |

| Time                          | N    | Nerve-sparing radical prostatectomy | External beam radiation therapy | Low-dose-rate brachytherapy | Untreated active surveillance | Nerve-sparing radical prostatectomy vs. Untreated active surveillance                     |                         |         | External beam radiation therapy vs. Untreated active surveillance |                         |         | Low-dose-rate brachytherapy vs. Untreated active surveillance |                         |         |  |
|-------------------------------|------|-------------------------------------|---------------------------------|-----------------------------|-------------------------------|-------------------------------------------------------------------------------------------|-------------------------|---------|-------------------------------------------------------------------|-------------------------|---------|---------------------------------------------------------------|-------------------------|---------|--|
|                               |      | (N=675)                             | (N=261)                         | (N=87)                      | (N=274)                       | Effect                                                                                    | 95% Confidence Interval | p-value | Effect                                                            | 95% Confidence Interval | p-value | Effect                                                        | 95% Confidence Interval | p-value |  |
| <b>Bowel function score</b>   |      |                                     |                                 |                             |                               | Unadjusted median (IQR) domain score                                                      |                         |         |                                                                   |                         |         |                                                               |                         |         |  |
|                               |      |                                     |                                 |                             |                               | Adjusted linear model; effect size = point difference between groups                      |                         |         |                                                                   |                         |         |                                                               |                         |         |  |
| Baseline                      | 1269 | 100 (96, 100)                       | 100 (96, 100)                   | 100 (96, 100)               | 100 (96, 100)                 |                                                                                           |                         |         |                                                                   |                         |         |                                                               |                         |         |  |
| 6 month                       | 1263 | 100 (96, 100)                       | 96 (88, 100)                    | 96 (83, 100)                | 100 (96, 100)                 | -0.1                                                                                      | [-1.5, 1.4]             | 0.93    | -3.4                                                              | [-5.5, -1.2]            | 0.002   | -5.6 <sup>b</sup>                                             | [-8.8, -2.5]            | <0.001  |  |
| 1 year                        | 1222 | 100 (96, 100)                       | 96 (88, 100)                    | 96 (83, 100)                | 100 (92, 100)                 | -0.2                                                                                      | [-1.3, 1.0]             | 0.79    | -3.6                                                              | [-5.2, -1.9]            | <0.001  | -5.2 <sup>b</sup>                                             | [-7.8, -2.6]            | <0.001  |  |
| 3 year                        | 1104 | 100 (96, 100)                       | 96 (88, 100)                    | 100 (88, 100)               | 100 (96, 100)                 | -0.4                                                                                      | [-1.7, 1.0]             | 0.61    | -3.9                                                              | [-5.9, -1.9]            | <0.001  | -3.9                                                          | [-6.7, -1.1]            | 0.006   |  |
| 5 year                        | 997  | 100 (96, 100)                       | 96 (88, 100)                    | 100 (88, 100)               | 100 (96, 100)                 | -0.4                                                                                      | [-2.0, 1.2]             | 0.62    | -3.6                                                              | [-5.9, -1.3]            | 0.002   | -3.2                                                          | [-6.1, -0.2]            | 0.04    |  |
| <b>Individual Items</b>       |      |                                     |                                 |                             |                               |                                                                                           |                         |         |                                                                   |                         |         |                                                               |                         |         |  |
| <b>Bowel function bother</b>  |      |                                     |                                 |                             |                               | Unadjusted frequency (%)                                                                  |                         |         |                                                                   |                         |         |                                                               |                         |         |  |
|                               |      |                                     |                                 |                             |                               | Adjusted logistic model; effect size = odds ratio of moderate or big problem              |                         |         |                                                                   |                         |         |                                                               |                         |         |  |
| Baseline                      | 1260 | 12 (2%)                             | 6 (2%)                          | 3 (3%)                      | 11 (4%)                       |                                                                                           |                         |         |                                                                   |                         |         |                                                               |                         |         |  |
| 6 month                       | 1263 | 20 (3%)                             | 11 (4%)                         | 7 (8%)                      | 9 (3%)                        | 1.6                                                                                       | [0.6, 4.0]              | 0.34    | 2.1                                                               | [0.8, 5.2]              | 0.11    | 3.3                                                           | [1.1, 10.1]             | 0.03    |  |
| 1 year                        | 1207 | 11 (2%)                             | 17 (7%)                         | 4 (5%)                      | 8 (3%)                        | 1.1                                                                                       | [0.5, 2.3]              | 0.84    | 1.7                                                               | [0.8, 3.5]              | 0.16    | 2.0                                                           | [0.8, 5.2]              | 0.14    |  |
| 3 year                        | 1105 | 10 (2%)                             | 9 (4%)                          | 2 (3%)                      | 8 (4%)                        | 0.6                                                                                       | [0.2, 1.9]              | 0.39    | 1.1                                                               | [0.4, 3.1]              | 0.91    | 0.8                                                           | [0.2, 4.0]              | 0.82    |  |
| 5 year                        | 1000 | 13 (2%)                             | 9 (4%)                          | 3 (5%)                      | 8 (4%)                        | 1.0                                                                                       | [0.4, 2.8]              | 0.97    | 1.1                                                               | [0.4, 3.3]              | 0.83    | 1.1                                                           | [0.2, 5.4]              | 0.87    |  |
| <b>Bloody stools</b>          |      |                                     |                                 |                             |                               | Unadjusted frequency (%)                                                                  |                         |         |                                                                   |                         |         |                                                               |                         |         |  |
|                               |      |                                     |                                 |                             |                               | Adjusted logistic model; effect size = odds ratio of moderate or big problem <sup>e</sup> |                         |         |                                                                   |                         |         |                                                               |                         |         |  |
| Baseline                      | 1267 | 2 (0%)                              | 2 (1%)                          | 0 (0%)                      | 4 (2%)                        |                                                                                           |                         |         |                                                                   |                         |         |                                                               |                         |         |  |
| 6 month                       | 1263 | 2 (0%)                              | 2 (1%)                          | 0 (0%)                      | 2 (1%)                        | e                                                                                         |                         |         | e                                                                 |                         |         | e                                                             |                         |         |  |
| 1 year                        | 1220 | 3 (0%)                              | 2 (1%)                          | 1 (1%)                      | 1 (0%)                        | e                                                                                         |                         |         | e                                                                 |                         |         | e                                                             |                         |         |  |
| 3 year                        | 1104 | 1 (0%)                              | 5 (2%)                          | 1 (1%)                      | 0 (0%)                        | e                                                                                         |                         |         | e                                                                 |                         |         | e                                                             |                         |         |  |
| 5 year                        | 998  | 0 (0%)                              | 1 (0%)                          | 0 (0%)                      | 0 (0%)                        | e                                                                                         |                         |         | e                                                                 |                         |         | e                                                             |                         |         |  |
| <b>Bowel urgency</b>          |      |                                     |                                 |                             |                               | Unadjusted frequency (%)                                                                  |                         |         |                                                                   |                         |         |                                                               |                         |         |  |
|                               |      |                                     |                                 |                             |                               | Adjusted logistic model; effect size = odds ratio of moderate or big problem              |                         |         |                                                                   |                         |         |                                                               |                         |         |  |
| Baseline                      | 1270 | 16 (2%)                             | 5 (2%)                          | 5 (6%)                      | 9 (3%)                        |                                                                                           |                         |         |                                                                   |                         |         |                                                               |                         |         |  |
| 6 month                       | 1265 | 14 (2%)                             | 10 (4%)                         | 9 (11%)                     | 11 (4%)                       | 0.9                                                                                       | [0.4, 2.1]              | 0.75    | 1.4                                                               | [0.6, 3.5]              | 0.48    | 3.4                                                           | [1.2, 9.4]              | 0.02    |  |
| 1 year                        | 1222 | 13 (2%)                             | 18 (7%)                         | 8 (10%)                     | 7 (3%)                        | 0.7                                                                                       | [0.4, 1.5]              | 0.41    | 1.7                                                               | [0.8, 3.6]              | 0.14    | 2.4                                                           | [1.0, 6.0]              | 0.05    |  |
| 3 year                        | 1105 | 8 (1%)                              | 16 (7%)                         | 3 (4%)                      | 7 (3%)                        | 0.5                                                                                       | [0.2, 1.5]              | 0.24    | 2.3                                                               | [0.8, 6.3]              | 0.11    | 1.5                                                           | [0.5, 4.8]              | 0.51    |  |
| 5 year                        | 998  | 10 (2%)                             | 15 (8%)                         | 6 (9%)                      | 8 (4%)                        | 0.5                                                                                       | [0.2, 1.4]              | 0.19    | 1.6                                                               | [0.6, 3.9]              | 0.34    | 2.3                                                           | [0.7, 7.1]              | 0.16    |  |
| <b>Domain</b>                 |      |                                     |                                 |                             |                               |                                                                                           |                         |         |                                                                   |                         |         |                                                               |                         |         |  |
| <b>Hormone function score</b> |      |                                     |                                 |                             |                               | Unadjusted median (IQR) domain score                                                      |                         |         |                                                                   |                         |         |                                                               |                         |         |  |
|                               |      |                                     |                                 |                             |                               | Adjusted linear model; effect size = point difference between groups                      |                         |         |                                                                   |                         |         |                                                               |                         |         |  |
| Baseline                      | 1245 | 95 (90, 100)                        | 95 (85, 100)                    | 100 (81, 100)               | 95 (85, 100)                  |                                                                                           |                         |         |                                                                   |                         |         |                                                               |                         |         |  |
| 6 month                       | 1245 | 95 (85, 100)                        | 95 (85, 100)                    | 95 (85, 100)                | 95 (85, 100)                  | -1.3                                                                                      | [-3.0, 0.4]             | 0.14    | -1.9                                                              | [-3.9, 0.1]             | 0.07    | -0.9                                                          | [-3.5, 1.7]             | 0.49    |  |
| 1 year                        | 1206 | 95 (85, 100)                        | 95 (84, 100)                    | 95 (81, 100)                | 95 (85, 100)                  | -1.1                                                                                      | [-2.4, 0.3]             | 0.11    | -1.4                                                              | [-3.0, 0.2]             | 0.10    | -0.2                                                          | [-2.0, 1.7]             | 0.85    |  |
| 3 year                        | 1089 | 95 (85, 100)                        | 95 (85, 100)                    | 100 (90, 100)               | 95 (88, 100)                  | -0.6                                                                                      | [-2.3, 1.0]             | 0.46    | -0.9                                                              | [-2.8, 1.1]             | 0.37    | 0.5                                                           | [-1.7, 2.8]             | 0.64    |  |
| 5 year                        | 984  | 95 (85, 100)                        | 95 (80, 100)                    | 95 (85, 100)                | 95 (90, 100)                  | -0.6                                                                                      | [-2.3, 1.2]             | 0.52    | -2.1                                                              | [-4.2, 0.0]             | 0.06    | -1.3                                                          | [-4.4, 1.7]             | 0.39    |  |

- a. Domain scores are from the Expanded Prostate Cancer Index Composite (EPIC-26). Domain scores are scaled from 0 to 100, with higher score indicating better function. The left side of the table shows unadjusted median domain score and interquartile range (25<sup>th</sup> percentile, 75<sup>th</sup> percentile). The right side shows multivariable model results. The effect size in the multivariable model for domain score indicates the adjusted mean point difference between groups at each time point. A minimally important difference in score is 10-12 points on the sexual function domain; 6-9 points on the urinary incontinence domain; 5-7 points on the urinary irritative domain; 4-6 points on the bowel domain; and 4-6 points on the hormonal domain. The primary outcome was the difference in domain score at 5 years.
- b. Signifies that the difference between groups exceeds the minimally important difference for clinical significance.
- c. Individual items are clinically important components of the domain, scored on a Likert scale and then dichotomized for group comparisons. The left side of the table shows the unadjusted number (%) of patients reporting a moderate or big problem. The right side shows the adjusted odds ratio of reporting a moderate or big problem comparing treatment groups.
- d. All regression models are adjusted for baseline domain score, age, race, comorbidity, disease risk group, physical function, social support, depression, medical decision-making style and accrual site.
- e. Analysis not performed because the limited number of events did not permit computation of reliable estimates.

eFigure 1: Unadjusted disease-specific function by time among Active Surveillance patients who remained untreated and those who progressed to treatment.

Unadjusted mean sexual (panel A) urinary incontinence (panel B), urinary irritative (panel C), bowel (panel D), and hormonal (panel E) function over time reported by men with low and favorable-intermediate risk prostate cancer managed with Active Surveillance who remained untreated and those who progressed to treatment.

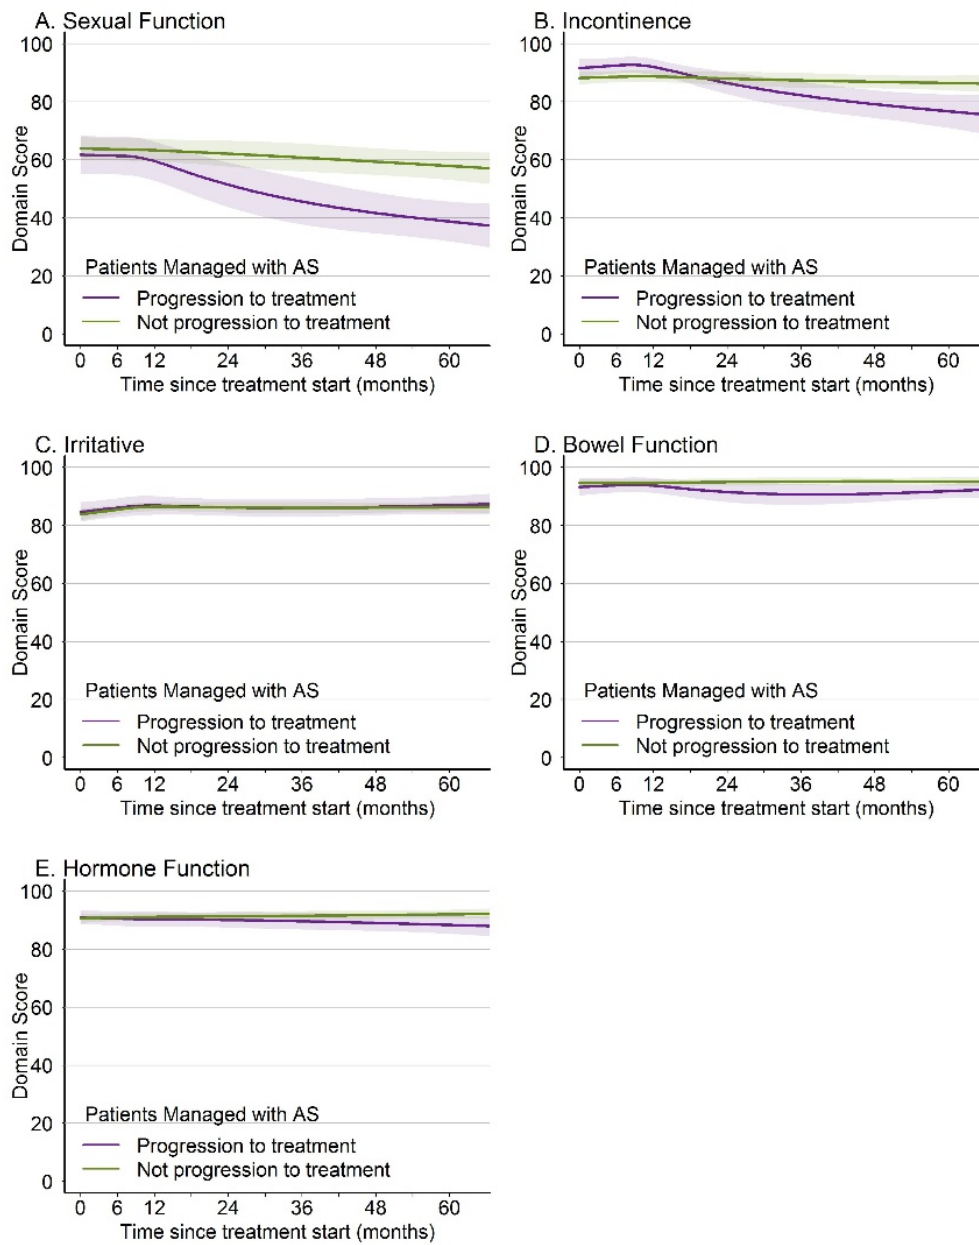

eTable 9. Unadjusted functional outcomes of unfavorable-risk patients on the Expanded Prostate Cancer Index Composite (EPIC) domain scores and selected individual item responses by treatment and time point; Adjusted differences between treatment groups in Expanded Prostate Cancer Index Composite domain scores and selected individual item responses by treatment and time point.

| Time                                                | External beam radiation therapy with androgen deprivation |               | Radical prostatectomy | External beam radiation therapy with androgen deprivation vs. Radical prostatectomy |                         |         |
|-----------------------------------------------------|-----------------------------------------------------------|---------------|-----------------------|-------------------------------------------------------------------------------------|-------------------------|---------|
|                                                     | N                                                         | (N=217)       | (N=402)               | Effect                                                                              | 95% Confidence interval | p-value |
| <b>Sexual Function Domain<sup>a</sup></b>           |                                                           |               |                       |                                                                                     |                         |         |
| <b>Sexual function score</b>                        | Unadjusted median (IQR) domain score                      |               |                       | Adjusted linear model<br>effect size = point difference between groups <sup>d</sup> |                         |         |
| Baseline                                            | 580                                                       | 48 (12, 80)   | 70 (33, 85)           |                                                                                     |                         |         |
| 6 month                                             | 562                                                       | 5 (0, 42)     | 15 (0, 38)            | 10.9 <sup>b</sup>                                                                   | [6.0, 15.8]             | <0.001  |
| 1 year                                              | 556                                                       | 17 (0, 52)    | 17 (0, 50)            | 9.8                                                                                 | [5.1, 14.5]             | <0.001  |
| 3 year                                              | 487                                                       | 20 (0, 60)    | 20 (0, 53)            | 9.1                                                                                 | [3.5, 14.8]             | 0.002   |
| 5 year                                              | 429                                                       | 27 (0, 65)    | 15 (0, 57)            | 12.5 <sup>b</sup>                                                                   | [6.2, 18.7]             | <0.001  |
| <b>Sexual Function Individual Items<sup>c</sup></b> |                                                           |               |                       |                                                                                     |                         |         |
| <b>Sexual function bother</b>                       | Unadjusted frequency (%)                                  |               |                       | Adjusted logistic model<br>effect size = odds ratio of moderate or big problem      |                         |         |
| Baseline                                            | 591                                                       | 70 (34%)      | 122 (32%)             |                                                                                     |                         |         |
| 6 month                                             | 569                                                       | 85 (43%)      | 207 (56%)             | 0.5                                                                                 | [0.3, 0.7]              | <0.001  |
| 1 year                                              | 555                                                       | 85 (45%)      | 195 (53%)             | 0.5                                                                                 | [0.4, 0.8]              | <0.001  |
| 3 year                                              | 493                                                       | 64 (40%)      | 155 (47%)             | 0.7                                                                                 | [0.4, 1.1]              | 0.11    |
| 5 year                                              | 433                                                       | 58 (44%)      | 145 (48%)             | 0.6                                                                                 | [0.4, 1.0]              | 0.08    |
| <b>Erection insufficient for penetration</b>        | Unadjusted frequency (%)                                  |               |                       | Adjusted logistic model<br>effect size = odds ratio of insufficient erection        |                         |         |
| Baseline                                            | 589                                                       | 120 (59%)     | 175 (45%)             |                                                                                     |                         |         |
| 6 month                                             | 567                                                       | 158 (81%)     | 322 (87%)             | 0.3                                                                                 | [0.2, 0.5]              | <0.001  |
| 1 year                                              | 557                                                       | 155 (81%)     | 303 (83%)             | 0.4                                                                                 | [0.2, 0.7]              | <0.001  |
| 3 year                                              | 492                                                       | 126 (79%)     | 264 (80%)             | 0.6                                                                                 | [0.3, 1.1]              | 0.13    |
| 5 year                                              | 434                                                       | 99 (75%)      | 243 (80%)             | 0.4                                                                                 | [0.2, 0.8]              | 0.01    |
| <b>Urinary Function Domains</b>                     |                                                           |               |                       |                                                                                     |                         |         |
| <b>Urinary Incontinence score</b>                   | Unadjusted median (IQR) domain score                      |               |                       | Adjusted linear model<br>effect size = point difference between groups              |                         |         |
| Baseline                                            | 597                                                       | 100 (75, 100) | 100 (79, 100)         |                                                                                     |                         |         |
| 6 month                                             | 583                                                       | 88 (67, 100)  | 60 (40, 85)           | 27.7 <sup>b</sup>                                                                   | [23.3, 32.1]            | <0.001  |
| 1 year                                              | 545                                                       | 92 (73, 100)  | 67 (46, 100)          | 25.6 <sup>b</sup>                                                                   | [21.5, 29.7]            | <0.001  |
| 3 year                                              | 494                                                       | 92 (75, 100)  | 67 (48, 92)           | 21.8 <sup>b</sup>                                                                   | [17.1, 26.6]            | <0.001  |
| 5 year                                              | 437                                                       | 92 (73, 100)  | 69 (46, 92)           | 23.2 <sup>b</sup>                                                                   | [17.7, 28.7]            | <0.001  |
| <b>Urinary Irritative score</b>                     | Unadjusted median (IQR) domain score                      |               |                       | Adjusted linear model<br>effect size = point difference between groups              |                         |         |
| Baseline                                            | 595                                                       | 88 (75, 94)   | 88 (69, 100)          |                                                                                     |                         |         |
| 6 month                                             | 577                                                       | 88 (75, 94)   | 88 (81, 100)          | -1.8                                                                                | [-4.4, 0.8]             | 0.18    |
| 1 year                                              | 556                                                       | 88 (75, 94)   | 94 (81, 100)          | -0.9                                                                                | [-3.1, 1.3]             | 0.44    |
| 3 year                                              | 500                                                       | 88 (81, 100)  | 94 (81, 100)          | 1.1                                                                                 | [-1.6, 3.7]             | 0.48    |
| 5 year                                              | 442                                                       | 88 (81, 94)   | 94 (81, 100)          | 1.2                                                                                 | [-2.2, 4.5]             | 0.50    |

| Time                                     | External beam radiation therapy with androgen deprivation |               |               | Radical prostatectomy                |                         |  | External beam radiation therapy with androgen deprivation vs. Radical prostatectomy |        |  |
|------------------------------------------|-----------------------------------------------------------|---------------|---------------|--------------------------------------|-------------------------|--|-------------------------------------------------------------------------------------|--------|--|
|                                          | N                                                         | (N=217)       | (N=402)       | Effect                               | 95% Confidence interval |  | p-value                                                                             |        |  |
| <b>Urinary Function Individual Items</b> |                                                           |               |               |                                      |                         |  |                                                                                     |        |  |
| <b>Urinary function bother</b>           |                                                           |               |               | Unadjusted frequency (%)             |                         |  | Adjusted logistic model<br>effect size = odds ratio of moderate or big problem      |        |  |
| Baseline                                 | 600                                                       | 23 (11%)      | 70 (18%)      |                                      |                         |  |                                                                                     |        |  |
| 6 month                                  | 584                                                       | 35 (17%)      | 78 (21%)      | 0.5                                  | [0.3, 0.8]              |  |                                                                                     | 0.004  |  |
| 1 year                                   | 558                                                       | 24 (12%)      | 56 (15%)      | 0.4                                  | [0.3, 0.7]              |  |                                                                                     | 0.001  |  |
| 3 year                                   | 507                                                       | 18 (11%)      | 54 (16%)      | 0.4                                  | [0.2, 0.7]              |  |                                                                                     | 0.005  |  |
| 5 year                                   | 444                                                       | 18 (13%)      | 52 (17%)      | 0.4                                  | [0.2, 0.8]              |  |                                                                                     | 0.005  |  |
| <b>Urinary leakage</b>                   |                                                           |               |               | Unadjusted frequency (%)             |                         |  | Adjusted logistic model<br>effect size = odds ratio of moderate or big problem      |        |  |
| Baseline                                 | 605                                                       | 7 (3%)        | 39 (10%)      |                                      |                         |  |                                                                                     |        |  |
| 6 month                                  | 586                                                       | 16 (8%)       | 81 (21%)      | 0.2                                  | [0.1, 0.4]              |  |                                                                                     | <0.001 |  |
| 1 year                                   | 560                                                       | 16 (8%)       | 71 (19%)      | 0.2                                  | [0.1, 0.3]              |  |                                                                                     | <0.001 |  |
| 3 year                                   | 501                                                       | 11 (7%)       | 55 (16%)      | 0.2                                  | [0.1, 0.4]              |  |                                                                                     | <0.001 |  |
| 5 year                                   | 447                                                       | 10 (7%)       | 49 (16%)      | 0.2                                  | [0.1, 0.5]              |  |                                                                                     | <0.001 |  |
| <b>Burning on urination</b>              |                                                           |               |               | Unadjusted frequency (%)             |                         |  | Adjusted logistic model<br>effect size = odds ratio of moderate or big problem      |        |  |
| Baseline                                 | 603                                                       | 6 (3%)        | 13 (3%)       |                                      |                         |  |                                                                                     |        |  |
| 6 month                                  | 585                                                       | 16 (8%)       | 8 (2%)        | 2.5                                  | [0.9, 6.9]              |  |                                                                                     | 0.07   |  |
| 1 year                                   | 561                                                       | 5 (3%)        | 7 (2%)        | 1                                    | [0.4, 2.7]              |  |                                                                                     | 0.97   |  |
| 3 year                                   | 505                                                       | 3 (2%)        | 11 (3%)       | 0.2                                  | [0, 0.8]                |  |                                                                                     | 0.03   |  |
| 5 year                                   | 447                                                       | 2 (1%)        | 10 (3%)       | 0.3                                  | [0.1, 1.4]              |  |                                                                                     | 0.14   |  |
| <b>Frequent urination</b>                |                                                           |               |               | Unadjusted frequency (%)             |                         |  | Adjusted logistic model<br>effect size = odds ratio of moderate or big problem      |        |  |
| Baseline                                 | 604                                                       | 49 (23%)      | 97 (25%)      |                                      |                         |  |                                                                                     |        |  |
| 6 month                                  | 582                                                       | 45 (22%)      | 85 (23%)      | 0.7                                  | [0.4, 1.1]              |  |                                                                                     | 0.15   |  |
| 1 year                                   | 562                                                       | 35 (18%)      | 74 (20%)      | 0.8                                  | [0.5, 1.2]              |  |                                                                                     | 0.21   |  |
| 3 year                                   | 510                                                       | 26 (15%)      | 49 (14%)      | 0.7                                  | [0.4, 1.3]              |  |                                                                                     | 0.25   |  |
| 5 year                                   | 447                                                       | 20 (14%)      | 55 (18%)      | 0.5                                  | [0.2, 0.9]              |  |                                                                                     | 0.02   |  |
| <b>Bowel Function Domain</b>             |                                                           |               |               |                                      |                         |  |                                                                                     |        |  |
| <b>Bowel function score</b>              |                                                           |               |               | Unadjusted median (IQR) domain score |                         |  | Adjusted linear model<br>effect size = point difference between groups              |        |  |
| Baseline                                 | 606                                                       | 100 (92, 100) | 100 (88, 100) |                                      |                         |  |                                                                                     |        |  |
| 6 month                                  | 585                                                       | 96 (79, 100)  | 100 (92, 100) | -5.4 <sup>b</sup>                    | [-8, -2.9]              |  |                                                                                     | <0.001 |  |
| 1 year                                   | 567                                                       | 92 (83, 100)  | 100 (92, 100) | -4.1 <sup>b</sup>                    | [-6.3, -1.9]            |  |                                                                                     | <0.001 |  |
| 3 year                                   | 505                                                       | 96 (83, 100)  | 100 (92, 100) | -1.6                                 | [-4.3, 1.2]             |  |                                                                                     | 0.26   |  |
| 5 year                                   | 445                                                       | 96 (83, 100)  | 100 (88, 100) | -2.0                                 | [-5.1, 1.1]             |  |                                                                                     | 0.21   |  |
| <b>Bowel Function Individual Items</b>   |                                                           |               |               |                                      |                         |  |                                                                                     |        |  |
| <b>Bowel function bother</b>             |                                                           |               |               | Unadjusted frequency (%)             |                         |  | Adjusted logistic model<br>effect size = odds ratio of moderate or big problem      |        |  |
| Baseline                                 | 602                                                       | 11 (5%)       | 17 (4%)       |                                      |                         |  |                                                                                     |        |  |
| 6 month                                  | 584                                                       | 20 (10%)      | 23 (6%)       | 1.1                                  | [0.5, 2.3]              |  |                                                                                     | 0.80   |  |
| 1 year                                   | 567                                                       | 18 (9%)       | 15 (4%)       | 1.3                                  | [0.7, 2.5]              |  |                                                                                     | 0.39   |  |
| 3 year                                   | 508                                                       | 13 (8%)       | 14 (4%)       | 1.4                                  | [0.5, 3.4]              |  |                                                                                     | 0.53   |  |
| 5 year                                   | 446                                                       | 9 (6%)        | 18 (6%)       | 0.6                                  | [0.2, 1.6]              |  |                                                                                     | 0.34   |  |



| Time                           | External beam radiation therapy with androgen deprivation |              |              | Radical prostatectomy                |                         |  | External beam radiation therapy with androgen deprivation vs. Radical prostatectomy |         |  |
|--------------------------------|-----------------------------------------------------------|--------------|--------------|--------------------------------------|-------------------------|--|-------------------------------------------------------------------------------------|---------|--|
|                                | N                                                         | (N=217)      | (N=402)      | Effect                               | 95% Confidence interval |  |                                                                                     | p-value |  |
| <b>Bloody stools</b>           |                                                           |              |              | Unadjusted frequency (%)             |                         |  | Adjusted logistic model<br>effect size = odds ratio of moderate or big problem      |         |  |
| Baseline                       | 605                                                       | 1 ( 0%)      | 0 ( 0%)      |                                      |                         |  |                                                                                     |         |  |
| 6 month                        | 586                                                       | 5 ( 2%)      | 2 ( 1%)      | 3.6                                  | [0.6, 21.3]             |  |                                                                                     | 0.15    |  |
| 1 year                         | 568                                                       | 6 ( 3%)      | 3 ( 1%)      | 2.0                                  | [0.5, 9.2]              |  |                                                                                     | 0.35    |  |
| 3 year                         | 507                                                       | 1 ( 1%)      | 6 ( 2%)      | 0.7                                  | [0.1, 3.8]              |  |                                                                                     | 0.68    |  |
| 5 year                         | 446                                                       | 2 ( 1%)      | 3 ( 1%)      | 0.9                                  | [0.1, 8.4]              |  |                                                                                     | 0.95    |  |
| <b>Bowel urgency</b>           |                                                           |              |              | Unadjusted frequency (%)             |                         |  | Adjusted logistic model<br>effect size = odds ratio of moderate or big problem      |         |  |
| Baseline                       | 607                                                       | 11 ( 5%)     | 27 ( 7%)     |                                      |                         |  |                                                                                     |         |  |
| 6 month                        | 587                                                       | 22 (11%)     | 19 ( 5%)     | 1.8                                  | [0.9, 3.9]              |  |                                                                                     | 0.12    |  |
| 1 year                         | 568                                                       | 16 ( 8%)     | 20 ( 5%)     | 1.7                                  | [0.9, 3.4]              |  |                                                                                     | 0.12    |  |
| 3 year                         | 507                                                       | 10 ( 6%)     | 11 ( 3%)     | 1.5                                  | [0.6, 4.1]              |  |                                                                                     | 0.41    |  |
| 5 year                         | 446                                                       | 13 ( 9%)     | 18 ( 6%)     | 1.5                                  | [0.6, 3.7]              |  |                                                                                     | 0.44    |  |
| <b>Hormone Function Domain</b> |                                                           |              |              |                                      |                         |  |                                                                                     |         |  |
| <b>Hormone function score</b>  |                                                           |              |              | Unadjusted median (IQR) domain score |                         |  | Adjusted linear model<br>effect size = point difference between groups              |         |  |
| Baseline                       | 592                                                       | 90 (80, 95)  | 90 (80, 100) |                                      |                         |  |                                                                                     |         |  |
| 6 month                        | 573                                                       | 81 (70, 95)  | 90 (80, 100) | -5.3                                 | [-8.2, -2.4]            |  |                                                                                     | <0.001  |  |
| 1 year                         | 558                                                       | 85 (70, 95)  | 90 (80, 100) | -3.9                                 | [-6.5, -1.4]            |  |                                                                                     | 0.002   |  |
| 3 year                         | 495                                                       | 90 (75, 95)  | 95 (80, 100) | -0.2                                 | [-3.0, 2.6]             |  |                                                                                     | 0.90    |  |
| 5 year                         | 438                                                       | 90 (80, 100) | 90 (80, 100) | 1.7                                  | [-1.4, 4.9]             |  |                                                                                     | 0.28    |  |

- a. Domain scores are from the Expanded Prostate Cancer Index Composite (EPIC-26). Domain scores are scaled from 0 to 100, with higher score indicating better function. The left side of the table shows unadjusted median domain score and interquartile range (25<sup>th</sup> percentile, 75<sup>th</sup> percentile). The right side shows multivariable model results. The effect size in the multivariable model for domain score indicates the adjusted mean point difference between groups at each time point. A minimally important difference in score is 10-12 points on the sexual function domain; 6-9 points on the urinary incontinence domain; 5-7 points on the urinary irritative domain; 4-6 points on the bowel domain; and 4-6 points on the hormonal domain 4-6. The primary outcome was the difference in domain score at 5 years.
- b. Signifies that the difference between groups exceeds the minimally important difference for clinical significance.

eTable 10. Unadjusted general health related quality of life outcomes of favorable-risk patients by treatment and time point; Adjusted differences between treatment groups in general health related quality of life domain scores by treatment and time point.

| Time                                          | N    | Nerve-sparing radical prostatectomy | External beam radiation therapy | Low-dose-rate brachytherapy | Active surveillance | Nerve-sparing radical prostatectomy vs. Active surveillance                                  |                         |         | External beam radiation therapy vs. Active surveillance |                         |         | Low-dose-rate brachytherapy vs. Active surveillance |                         |         |
|-----------------------------------------------|------|-------------------------------------|---------------------------------|-----------------------------|---------------------|----------------------------------------------------------------------------------------------|-------------------------|---------|---------------------------------------------------------|-------------------------|---------|-----------------------------------------------------|-------------------------|---------|
|                                               |      | (N=675)                             | (N=261)                         | (N=87)                      | (N=363)             | Effect                                                                                       | 95% Confidence Interval | p-value | Effect                                                  | 95% Confidence Interval | p-value | Effect                                              | 95% Confidence Interval | p-value |
| <b>Physical Function Score<sup>a</sup></b>    |      |                                     |                                 |                             |                     | <b>Adjusted linear model<sup>b</sup>; effect size = mean point difference between groups</b> |                         |         |                                                         |                         |         |                                                     |                         |         |
| Unadjusted median (IQR)                       |      |                                     |                                 |                             |                     |                                                                                              |                         |         |                                                         |                         |         |                                                     |                         |         |
| 6 month                                       | 1350 | 95 (85, 100)                        | 90 (70, 100)                    | 95 (75, 100)                | 95 (80, 100)        | -1.0                                                                                         | [-3.0, 0.9]             | 0.30    | -2.1                                                    | [-4.6, 0.4]             | 0.10    | -3.4                                                | [-6.9, 0.1]             | 0.05    |
| 1 year                                        | 1315 | 100 (95, 100)                       | 93 (75, 100)                    | 95 (80, 100)                | 95 (85, 100)        | -0.5                                                                                         | [-2.1, 1.1]             | 0.54    | -1.8                                                    | [-3.9, 0.3]             | 0.09    | -3.6                                                | [-6.8, -0.5]            | 0.02    |
| 3 year                                        | 1190 | 95 (85, 100)                        | 90 (67, 95)                     | 90 (60, 100)                | 95 (80, 100)        | 0.5                                                                                          | [-1.6, 2.5]             | 0.67    | -2.3                                                    | [-5.0, 0.4]             | 0.10    | -4.6                                                | [-8.7, -0.5]            | 0.03    |
| 5 year                                        | 1083 | 95 (85, 100)                        | 85 (65, 95)                     | 90 (74, 100)                | 90 (80, 100)        | 0.0                                                                                          | [-2.4, 2.4]             | 0.99    | -4.8                                                    | [-8.2, -1.4]            | 0.006   | -5.8                                                | [-11.0, -0.6]           | 0.03    |
| <b>Emotional Well Being Score<sup>a</sup></b> |      |                                     |                                 |                             |                     |                                                                                              |                         |         |                                                         |                         |         |                                                     |                         |         |
| 6 month                                       | 1352 | 88 (76, 92)                         | 88 (72, 92)                     | 88 (79, 92)                 | 88 (76, 92)         | 0.3                                                                                          | [-1.5, 2.0]             | 0.78    | -1.0                                                    | [-3.2, 1.1]             | 0.36    | 1.2                                                 | [-1.5, 3.9]             | 0.38    |
| 1 year                                        | 1304 | 88 (76, 92)                         | 88 (72, 92)                     | 92 (75, 96)                 | 88 (76, 92)         | 0.7                                                                                          | [-0.8, 2.1]             | 0.39    | -0.3                                                    | [-2.1, 1.5]             | 0.76    | 1.6                                                 | [-0.9, 4.1]             | 0.21    |
| 3 year                                        | 1186 | 88 (76, 92)                         | 88 (72, 92)                     | 88 (76, 92)                 | 88 (76, 92)         | 1.2                                                                                          | [-0.6, 3.0]             | 0.18    | 1.0                                                     | [-1.1, 3.1]             | 0.37    | 2.0                                                 | [-1.2, 5.1]             | 0.22    |
| 5 year                                        | 1082 | 88 (76, 92)                         | 88 (76, 92)                     | 88 (74, 96)                 | 88 (76, 92)         | 0.5                                                                                          | [-1.4, 2.5]             | 0.60    | 0.3                                                     | [-2.1, 2.7]             | 0.81    | 0.9                                                 | [-3.6, 5.3]             | 0.71    |
| <b>Energy/Fatigue Score<sup>a</sup></b>       |      |                                     |                                 |                             |                     |                                                                                              |                         |         |                                                         |                         |         |                                                     |                         |         |
| 6 month                                       | 1351 | 80 (60, 85)                         | 70 (55, 80)                     | 75 (55, 85)                 | 75 (60, 85)         | 0.1                                                                                          | [-2.0, 2.2]             | 0.95    | -2.7                                                    | [-5.3, -0.2]            | 0.04    | -1.7                                                | [-5.4, 1.9]             | 0.36    |
| 1 year                                        | 1304 | 80 (65, 85)                         | 70 (55, 80)                     | 75 (54, 85)                 | 75 (60, 85)         | 0.1                                                                                          | [-1.6, 1.8]             | 0.92    | -1.6                                                    | [-3.7, 0.5]             | 0.13    | -0.7                                                | [-3.9, 2.5]             | 0.67    |
| 3 year                                        | 1186 | 75 (60, 85)                         | 70 (55, 81)                     | 75 (55, 85)                 | 75 (60, 85)         | 0.3                                                                                          | [-1.6, 2.3]             | 0.75    | 0.0                                                     | [-2.5, 2.4]             | 0.97    | 1.4                                                 | [-2.2, 5.0]             | 0.45    |
| 5 year                                        | 1082 | 75 (60, 85)                         | 70 (54, 80)                     | 70 (60, 85)                 | 75 (55, 85)         | 0.7                                                                                          | [-1.5, 2.9]             | 0.51    | -1.8                                                    | [-4.7, 1.1]             | 0.22    | 1.2                                                 | [-3.7, 6.0]             | 0.64    |

Footnote:

<sup>a</sup>. Domain scores are from the Medical Outcomes Study – Short Form-36 general quality of life instrument. Domain scores are scaled from 0 to 100, with higher score indicating better function or less disability. The left side of the table shows unadjusted median score and Interquartile range (IQR). The right side shows multivariable model results.

<sup>b</sup>. The effect size in the multivariable model for domain score indicates the adjusted mean point difference between groups at each time point. A minimally important difference in score is estimated as 7 for Physical Function Score, 6 for Emotional Well-Being Score, and 9 for Energy/Fatigue Score. The primary outcome was the difference in domain score at 5 years. All regression models are adjusted for baseline domain score, age, race, comorbidity, prostate cancer risk group, social support, depression, medical decision-making style and accrual site.

eTable 11. Unadjusted general health related quality of life outcomes of unfavorable-risk patients by treatment and time point; Adjusted differences between treatment groups in general health related quality of life domain scores by treatment and time point.

| Time                                          | N   | External beam radiation therapy with androgen deprivation | Radical prostatectomy | External beam radiation therapy with androgen deprivation vs. Radical prostatectomy      |                         |         |
|-----------------------------------------------|-----|-----------------------------------------------------------|-----------------------|------------------------------------------------------------------------------------------|-------------------------|---------|
|                                               |     | (N=217)                                                   | (N=402)               | Effect                                                                                   | 95% Confidence interval | p-value |
| <b>Physical Function Score<sup>a</sup></b>    |     |                                                           |                       |                                                                                          |                         |         |
|                                               |     | Unadjusted median (IQR)                                   |                       | Adjusted linear model <sup>b</sup><br>effect size = mean point difference between groups |                         |         |
| 6 month                                       | 586 | 75 (48, 94)                                               | 90 (80, 100)          | -4.7                                                                                     | [-8.2, -1.1]            | 0.01    |
| 1 year                                        | 567 | 85 (55, 95)                                               | 95 (80, 100)          | -4.2                                                                                     | [-7.6, -0.8]            | 0.01    |
| 3 year                                        | 508 | 80 (50, 95)                                               | 95 (80, 100)          | -4.8                                                                                     | [-9.0, -0.7]            | 0.02    |
| 5 year                                        | 448 | 80 (40, 95)                                               | 90 (75, 100)          | -8.1                                                                                     | [-13.3, -2.9]           | 0.002   |
| <b>Emotional Well Being Score<sup>a</sup></b> |     |                                                           |                       |                                                                                          |                         |         |
| 6 month                                       | 583 | 86 (72, 92)                                               | 84 (76, 92)           | -0.7                                                                                     | [-3.1, 1.6]             | 0.54    |
| 1 year                                        | 568 | 84 (68, 92)                                               | 84 (72, 92)           | -1.1                                                                                     | [-3.3, 1.1]             | 0.35    |
| 3 year                                        | 504 | 84 (72, 92)                                               | 84 (72, 92)           | -1.7                                                                                     | [-4.4, 1.1]             | 0.24    |
| 5 year                                        | 448 | 84 (68, 92)                                               | 88 (72, 92)           | -1.5                                                                                     | [-4.7, 1.6]             | 0.34    |
| <b>Energy/Fatigue Score<sup>a</sup></b>       |     |                                                           |                       |                                                                                          |                         |         |
| 6 month                                       | 583 | 65 (50, 80)                                               | 75 (60, 80)           | -2.4                                                                                     | [-5.4, 0.6]             | 0.12    |
| 1 year                                        | 568 | 65 (50, 76)                                               | 75 (60, 85)           | -3.3                                                                                     | [-6.0, -0.7]            | 0.01    |
| 3 year                                        | 504 | 65 (55, 80)                                               | 70 (60, 85)           | -3.4                                                                                     | [-6.7, -0.2]            | 0.04    |
| 5 year                                        | 448 | 65 (50, 80)                                               | 70 (55, 80)           | 0.2                                                                                      | [-3.4, 3.8]             | 0.91    |

Footnote:

<sup>a</sup>. Domain scores are from the Medical Outcomes Study– Short Form-36 general quality of life instrument. Domain scores are scaled from 0 to 100, with higher score indicating better function or less disability. The left side of the table shows unadjusted median score and Interquartile range (IQR). The right side shows multivariable model results.

<sup>b</sup>. The effect size in the multivariable model for domain score indicates the adjusted mean point difference between groups at each time point. A minimally important difference in score is estimated as 7 for Physical Function Score, 6 for Emotional Well-Being Score, and 9 for Energy/Fatigue Score. The primary outcome was the difference in domain score at 5 years. All regression models are adjusted for baseline domain score, age, race, comorbidity, prostate cancer risk group, social support, depression, medical decision-making style and accrual site.

eFigure 2. Adjusted general health related quality of life outcomes of favorable-risk patients by treatment and time point.

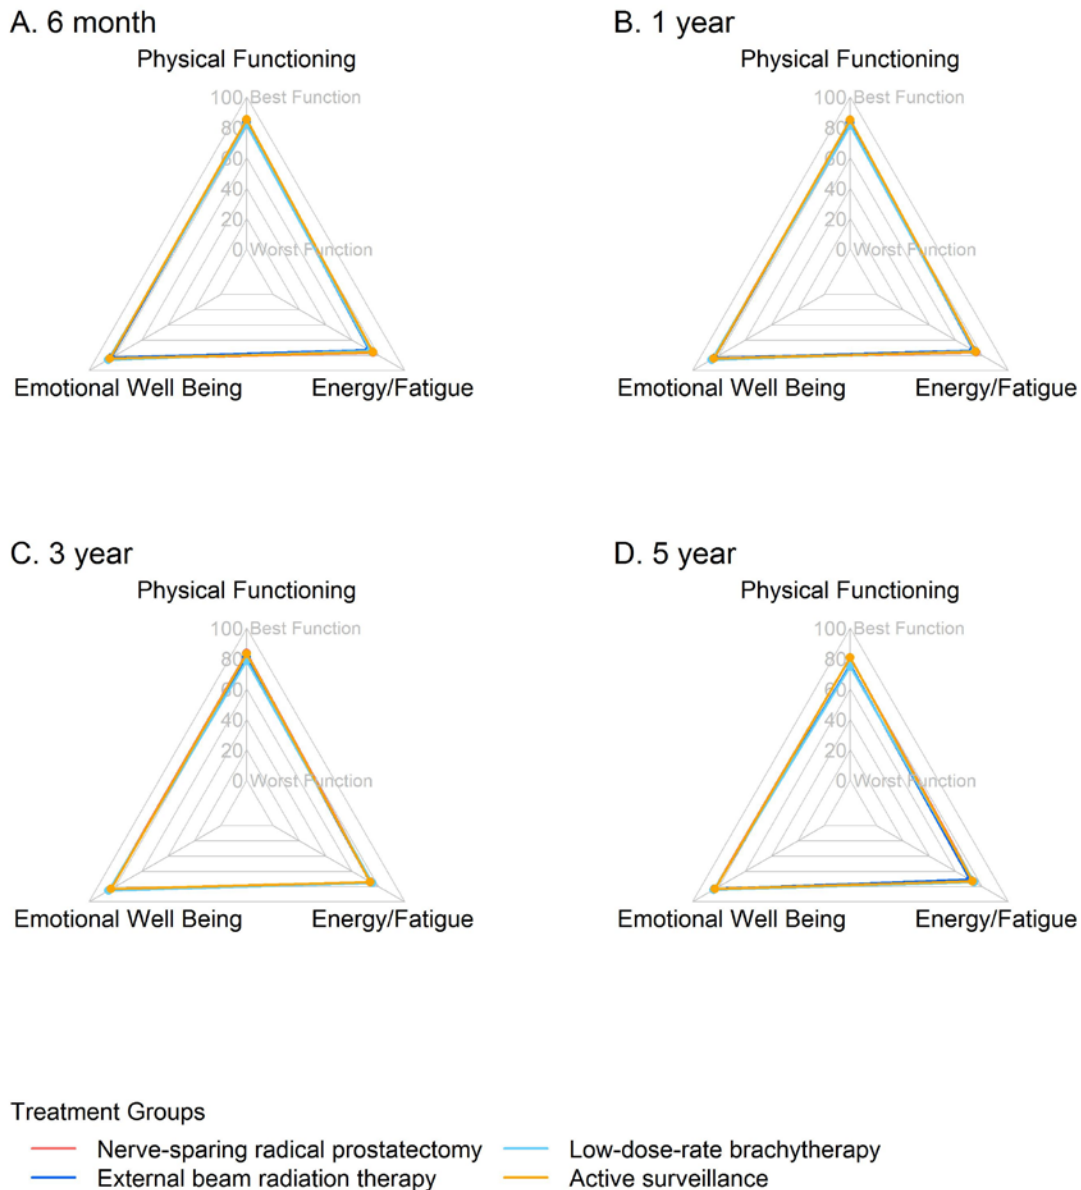

Legend: Adjusted mean scores on the Medical Outcomes Study Short Form-36 are plotted for each treatment group at (A) 6 months, (B) 1 year, (C) 3 years and (D) 5 years after treatment among men with favorable-risk disease. The center of each figure represents worst function (score of zero), while the outermost line represents best function (score of 100.) The regression models are adjusted for baseline domain score, age, race, comorbidity, cancer characteristics, social support, depression, medical decision-making style and accrual site.

eFigure 3. Adjusted general health related quality of life outcomes of unfavorable-risk patients by treatment and time point.

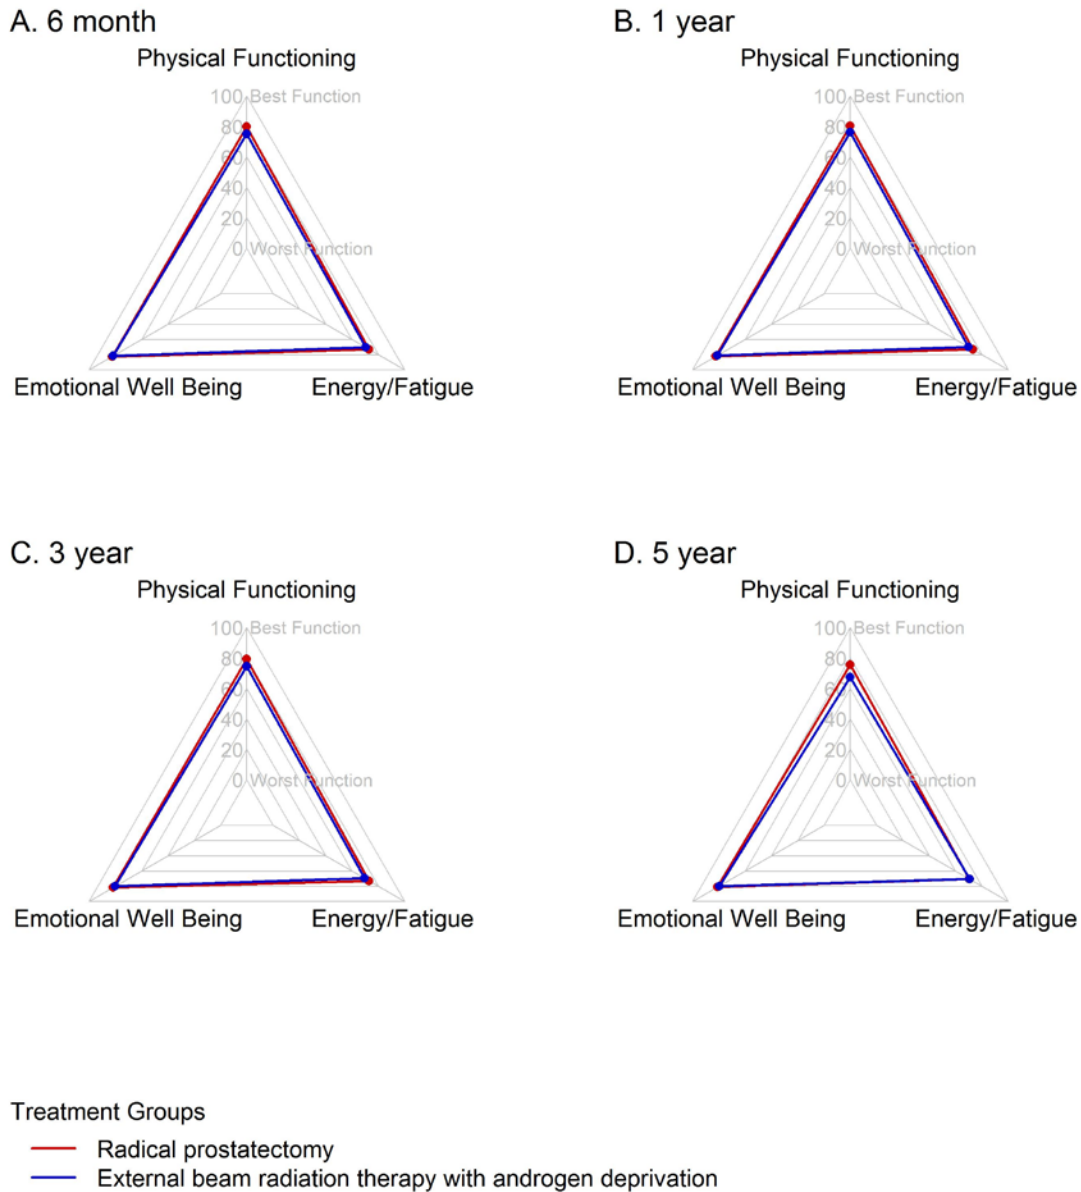

Legend: Adjusted mean scores on the Medical Outcomes Study Short Form-36 are plotted for each treatment group at (A) 6 months, (B) 1 year, (C) 3 years and (D) 5 years after treatment among men with unfavorable-risk disease. The center of each figure represents worst function (score of zero), while the outermost line represents best function (score of 100.) The regression models are adjusted for baseline domain score, age, race, comorbidity, cancer characteristics, social support, depression, medical decision-making style and accrual site.

## Exploratory Analyses of Effect Modification of Covariates

### Section 1: Interaction term for Treatment X Baseline Function

For each EPIC-26 domain score multivariable model, we tested the interaction term between treatment and baseline function domain score on the EPIC-26 (excellent vs. less than excellent, defined as baseline domain score  $\geq 90$  vs.  $< 90$  for sexual function and  $100$  vs  $< 100$  for all other domains).

The proportion of patients with excellent baseline function in the sexual function domain was 29.7% in the favorable risk group and 19.0% in the unfavorable risk group; in the urinary incontinence domain was 69.3% in the favorable risk group and 62.6% in the unfavorable risk group; in the urinary irritative domain was 44.9% in the favorable risk group and 39.5% in the unfavorable risk group; in the bowel function domain was 83.6% in the favorable risk group and 74.6% in the unfavorable risk group; and in the hormone function domain was 73.4% in the favorable risk group and 59.3% in the unfavorable risk group.

eTable 12. P value for the interaction term (Treatment X Baseline function [excellent vs. lower])

| EPIC-26 Domain       | Favorable-risk disease cohort | Unfavorable-risk disease cohort |
|----------------------|-------------------------------|---------------------------------|
| Sexual function      | 0.008                         | 0.007                           |
| Urinary incontinence | 0.009                         | $p < .001$                      |
| Urinary irritative   | $p < .001$                    | 0.03                            |
| Bowel function       | 0.40                          | 0.55                            |
| Hormone function     | 0.64                          | 0.12                            |

In these exploratory analyses, the interaction term was significant in the models for sexual function, urinary incontinence and urinary irritative function in both favorable-risk and unfavorable risk men (eTable 12). Therefore, we went on to show plots of unadjusted mean disease-specific function over time, stratified by baseline function (eFigure 4). Each figure shows, on the left, unadjusted mean disease-specific function over time reported by men with low and favorable-intermediate risk prostate cancer managed with nerve-sparing radical prostatectomy (NS-RP), external beam radiation therapy (EBRT), brachytherapy (BT), and active surveillance (AS), stratified by baseline function. Shaded regions indicate 95% confidence interval. The right side panels show unadjusted mean disease-specific function over time reported by men with high and unfavorable-intermediate risk prostate cancer managed with radical prostatectomy (RP) and external beam radiation therapy with androgen deprivation therapy (EBRT-ADT), stratified by baseline function. Shaded regions indicate 95% confidence interval.

In general, the figures demonstrate larger differences between groups in men who start with higher baseline function. The exception is in the urinary irritative domain in the favorable risk cohort, in which men treated with prostatectomy experience improvement and men undergoing brachytherapy experience exacerbation of symptoms, and the difference appears larger in the group with poor baseline function.

eFigure 4A. Sexual Function Domain Score By Treatment in Men with Favorable-Risk Disease and Unfavorable Risk Disease According to Baseline Sexual Function Domain Score (Excellent  $\geq 90$ ; or Lower  $< 90$ )

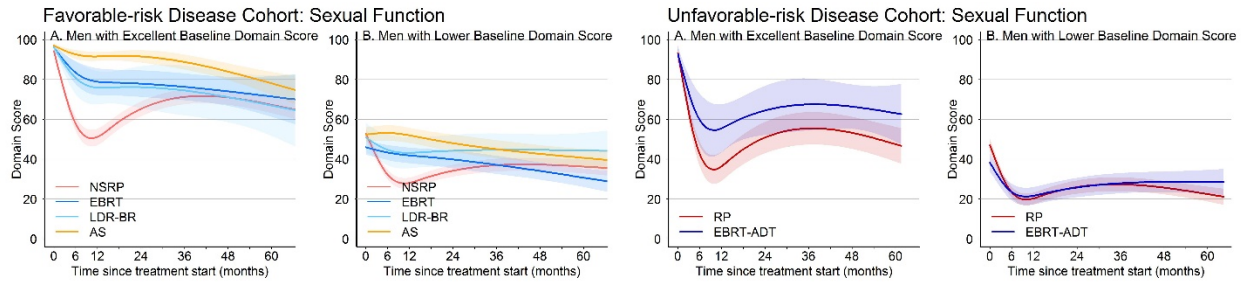

eFigure 4B. Urinary Incontinence Function Domain Score By Treatment in Men with Favorable-Risk Disease and Unfavorable Risk Disease According to Baseline Urinary Incontinence Function Domain Score (Excellent = 100; or Lower  $< 100$ )

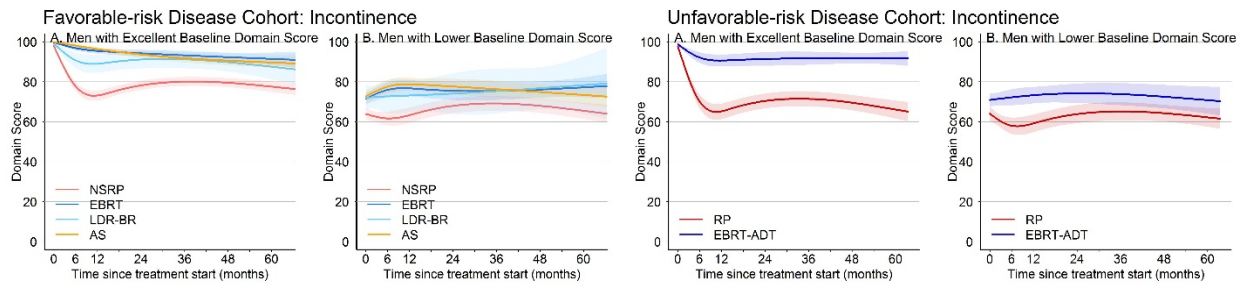

eFigure 4C. Urinary Irritative Function Domain Score By Treatment in Men with Favorable-Risk Disease and Unfavorable Risk Disease According to Baseline Urinary Irritative Function Domain Score (Excellent = 100; or Lower  $< 100$ )

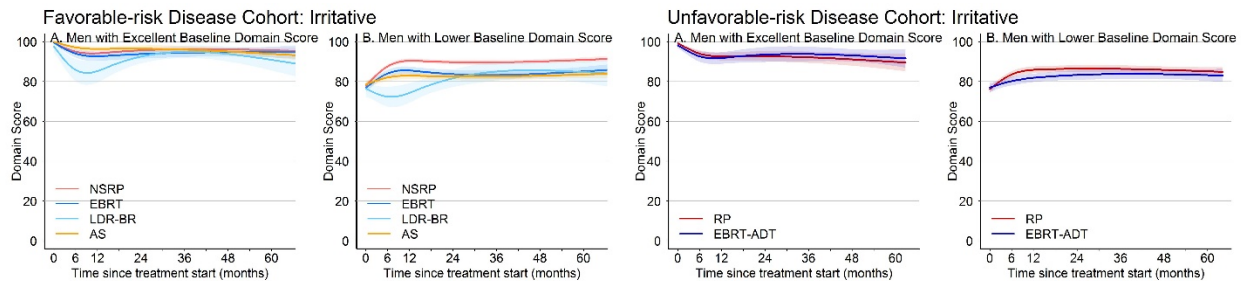

## Section 2: Interaction term for Treatment X Comorbidity Score

For each EPIC-26 domain score multivariable model, we tested the interaction term between treatment and comorbidity score from the Total Illness Burden Index for Prostate Cancer (TIBI-Cap). Scores were categorized as low (0-2, 30.0% favorable risk and 24.3% unfavorable risk), intermediate (3-4, 42.7% favorable risk and 40.0% unfavorable risk) or high (5 or more, 27.3% favorable risk and 35.7% unfavorable risk).

eTable 13. P value for the interaction term (Treatment X Comorbidity score [low, intermediate or high])

| EPIC-26 Domain       | Favorable-risk disease cohort | Unfavorable-risk disease cohort |
|----------------------|-------------------------------|---------------------------------|
| Sexual function      | 0.04                          | 0.69                            |
| Urinary incontinence | 0.36                          | 0.90                            |
| Urinary irritative   | 0.27                          | 0.48                            |
| Bowel function       | 0.96                          | 0.28                            |
| Hormone function     | 0.68                          | 0.03                            |

In these exploratory analyses, the interaction term was significant in the models for sexual function in the favorable risk cohort and for hormonal function in the unfavorable risk cohort (eTable 13). Therefore, we went on to show plots of unadjusted mean disease-specific function for these domains over time, stratified by comorbidity level (eFigure 5A, 5B).

eFigure 5A shows unadjusted mean disease-specific sexual function over time reported by men with favorable-risk prostate cancer managed with nerve-sparing radical prostatectomy (NSRP), external beam radiation therapy (EBRT), brachytherapy (BT), and active surveillance (AS), stratified by comorbidity level. Shaded regions indicate 95% confidence interval.

The figure demonstrates that the relationship between treatment and sexual function outcome is modified by comorbidity level.

eFigure 5A. Sexual Function Domain Score By Treatment in Men with Favorable-Risk Disease According to Comorbidity Level (Low 0-2, Intermediate 3-4, High >= 5)

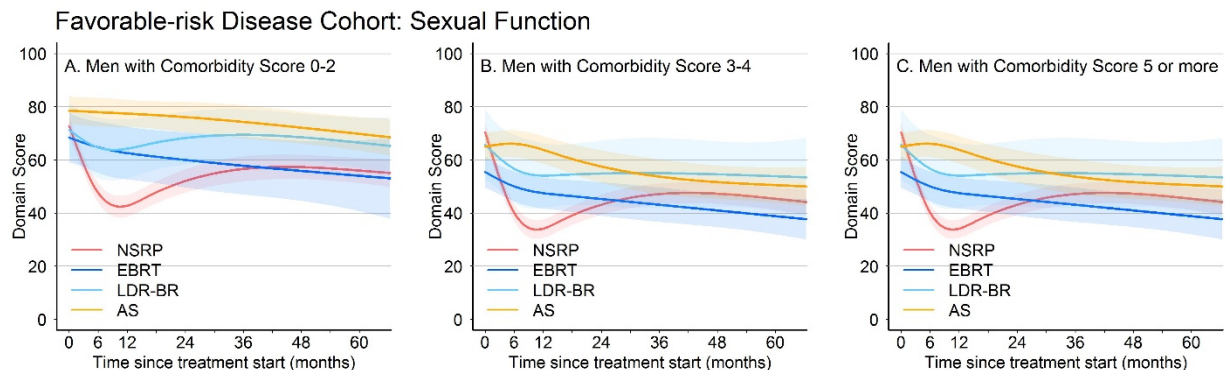



eFigure 5B shows unadjusted mean disease-specific hormone function over time reported by men with unfavorable-risk prostate cancer managed with radical prostatectomy (RP) and external beam radiation therapy with androgen deprivation therapy (EBRT-ADT), stratified by comorbidity. Shaded regions indicate 95% confidence interval.

The figure demonstrates that the relationship between treatment and hormone function outcome is modified by comorbidity level.

eFigure 5B. Hormonal Function Domain Score By Treatment in Men with Unfavorable-Risk Disease According to Comorbidity Level (Low 0-2, Intermediate 3-4, High  $\geq 5$ )

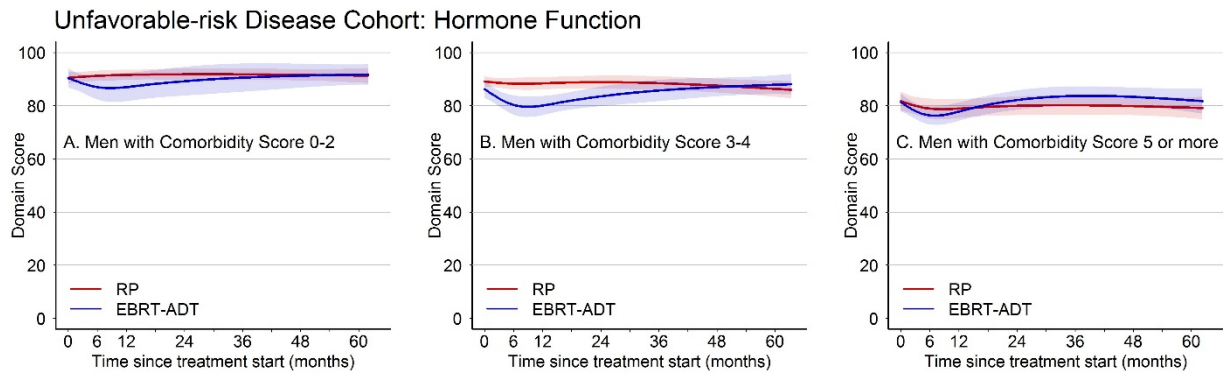

### Section 3: Interaction term for Treatment X Disease Risk Stratum

For each EPIC-26 domain score multivariable model, we tested the interaction term between treatment and National Comprehensive Care Network (NCCN) disease risk stratum. The favorable risk disease cohort was comprised of 66% low-risk (PSA < 10 and cT1c or T2a and Biopsy Grade Group 1) and 34% favorable intermediate risk patients (PSA 10-19.9 or cT2b or Biopsy Grade Group 2). The unfavorable risk disease cohort was comprised of 35% unfavorable intermediate-risk (PSA 10-19.9 or cT2b or Biopsy Grade Group 3) and 65% high-risk patients (PSA  $\geq$  20 or cT2c or higher or Biopsy Grade Group 4 or 5).

eTable 14. P value for the interaction term (Treatment X Disease risk stratum [low or favorable intermediate in the favorable risk disease cohort; unfavorable intermediate or high in the unfavorable disease risk cohort])

| EPIC-26 Domain       | Favorable-risk disease cohort | Unfavorable-risk disease cohort |
|----------------------|-------------------------------|---------------------------------|
| Sexual function      | 0.64                          | 0.03                            |
| Urinary incontinence | 0.30                          | 0.66                            |
| Urinary irritative   | 0.15                          | 0.74                            |
| Bowel function       | 0.77                          | 0.12                            |
| Hormone function     | 0.41                          | 0.50                            |

In these exploratory analyses, the interaction term was significant in the model for sexual function in the unfavorable risk cohort (eTable 14). Therefore, we went on to show plots of unadjusted mean disease-specific function for these domains over time, stratified by disease risk stratum (eFigure 6).

eFigure 6 shows unadjusted mean disease-specific function over time reported by men in the unfavorable risk disease cohort managed with radical prostatectomy (RP) and external beam radiation therapy with androgen deprivation therapy (EBRT-ADT), stratified by disease risk stratum (unfavorable intermediate risk and high risk). Shaded regions indicate 95% confidence interval.

eFigure 6 demonstrates that the relationship between treatment and sexual function outcome is modified by NCCN disease risk stratum. Further analysis, controlling for all covariates, showed that radical prostatectomy was associated with clinically significantly worse sexual function compared to patients treated with external beam radiation therapy with androgen deprivation therapy throughout the five-year period for the unfavorable intermediate-risk patients (AMD at 5 years -20.3 [-30.0, -10.5],  $p < 0.001$ ). There was no clinically meaningful difference between radical prostatectomy and external beam radiation therapy with androgen deprivation therapy throughout the five-year period for the high-risk patients (AMD at 5 years -8.4 [-16.5, -0.3],  $p = 0.041$ ).

eFigure 6. Sexual Function Domain Score By Treatment in Men with Unfavorable-Risk Disease According to National Comprehensive Care Network Disease Risk Stratum

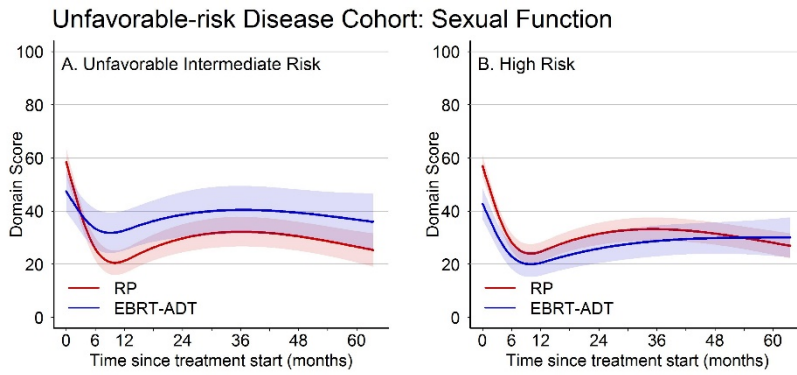

#### Section 4: Interaction term for Treatment X Race

For each EPIC-26 domain score multivariable model, we tested the interaction term between treatment and race (Black vs. non-Black). The favorable risk group was 11% Black and 89% non-Black. The unfavorable risk group was 15% Black and 85% non-Black.

eTable 15. P value for the interaction term (Treatment X Race)

| EPIC-26 Domain       | Favorable-risk disease cohort | Unfavorable-risk disease cohort |
|----------------------|-------------------------------|---------------------------------|
| Sexual function      | 0.47                          | 0.96                            |
| Urinary incontinence | 0.86                          | 0.72                            |
| Urinary irritative   | 0.50                          | 0.95                            |
| Bowel function       | 0.48                          | 0.07                            |
| Hormone function     | 0.30                          | 0.88                            |

In these exploratory analyses, the interaction term was not significant in any of the models, so no further analyses were performed.
